# Supplementary material for: Haematological dynamics following treatment of visceral leishmaniasis: a protocol for systematic review and individual participant data (IPD) meta-analysis
Source: PubMed Central journal article supplement (PMC10729213; doi:10.1136/bmjopen-2023-074841), 2023-12-14
Supplement: bmjopen-2023-074841.draft_revisions.pdf [file bmjopen-2023-074841.draft_revisions.pdf]

# BMJ Open

BMJ Open is committed to open peer review. As part of this commitment we make the peer review history of every article we publish publicly available.

When an article is published we post the peer reviewers' comments and the authors' responses online. We also post the versions of the paper that were used during peer review. These are the versions that the peer review comments apply to.

The versions of the paper that follow are the versions that were submitted during the peer review process. They are not the versions of record or the final published versions. They should not be cited or distributed as the published version of this manuscript.

BMJ Open is an open access journal and the full, final, typeset and author-corrected version of record of the manuscript is available on our site with no access controls, subscription charges or pay-per-view fees (<http://bmjopen.bmj.com>).

If you have any questions on BMJ Open's open peer review process please email [info.bmjopen@bmj.com](mailto:info.bmjopen@bmj.com)

# BMJ Open

## Haematological dynamics following treatment of visceral leishmaniasis: a protocol for systematic review and individual participant data (IPD) meta-analysis

|                               |                                                                                                                                                                                                                                                                                                                                                                                                                                                                                                                                                                                                                                                                                                                                                                                                                                                                                                                                                                                                                                                                                                                                                                                                                                                                                                                                                                                                                                                                                                                                                                                                                                                                                                                                                                                                                                                                                                                                                                                                                                                                                                                                                                                                                                                                                                    |
|-------------------------------|----------------------------------------------------------------------------------------------------------------------------------------------------------------------------------------------------------------------------------------------------------------------------------------------------------------------------------------------------------------------------------------------------------------------------------------------------------------------------------------------------------------------------------------------------------------------------------------------------------------------------------------------------------------------------------------------------------------------------------------------------------------------------------------------------------------------------------------------------------------------------------------------------------------------------------------------------------------------------------------------------------------------------------------------------------------------------------------------------------------------------------------------------------------------------------------------------------------------------------------------------------------------------------------------------------------------------------------------------------------------------------------------------------------------------------------------------------------------------------------------------------------------------------------------------------------------------------------------------------------------------------------------------------------------------------------------------------------------------------------------------------------------------------------------------------------------------------------------------------------------------------------------------------------------------------------------------------------------------------------------------------------------------------------------------------------------------------------------------------------------------------------------------------------------------------------------------------------------------------------------------------------------------------------------------|
| Journal:                      | <i>BMJ Open</i>                                                                                                                                                                                                                                                                                                                                                                                                                                                                                                                                                                                                                                                                                                                                                                                                                                                                                                                                                                                                                                                                                                                                                                                                                                                                                                                                                                                                                                                                                                                                                                                                                                                                                                                                                                                                                                                                                                                                                                                                                                                                                                                                                                                                                                                                                    |
| Manuscript ID                 | bmjopen-2023-074841                                                                                                                                                                                                                                                                                                                                                                                                                                                                                                                                                                                                                                                                                                                                                                                                                                                                                                                                                                                                                                                                                                                                                                                                                                                                                                                                                                                                                                                                                                                                                                                                                                                                                                                                                                                                                                                                                                                                                                                                                                                                                                                                                                                                                                                                                |
| Article Type:                 | Protocol                                                                                                                                                                                                                                                                                                                                                                                                                                                                                                                                                                                                                                                                                                                                                                                                                                                                                                                                                                                                                                                                                                                                                                                                                                                                                                                                                                                                                                                                                                                                                                                                                                                                                                                                                                                                                                                                                                                                                                                                                                                                                                                                                                                                                                                                                           |
| Date Submitted by the Author: | 18-Apr-2023                                                                                                                                                                                                                                                                                                                                                                                                                                                                                                                                                                                                                                                                                                                                                                                                                                                                                                                                                                                                                                                                                                                                                                                                                                                                                                                                                                                                                                                                                                                                                                                                                                                                                                                                                                                                                                                                                                                                                                                                                                                                                                                                                                                                                                                                                        |
| Complete List of Authors:     | <p>Munir, Abdalla; Infectious Diseases Data Observatory (IDDO); University of Oxford, Centre for Tropical Medicine and Global Health, Nuffield Department of Clinical Medicine</p> <p>Dahal, Prabin; University of Oxford, Centre for Tropical Medicine and Global Health, Nuffield Department of Clinical Medicine</p> <p>Kumar, Rishikesh; Rajendra Memorial Research Institute of Medical Sciences (RMRIMS)</p> <p>Singh-Phulgenda, Sauman; Infectious Diseases Data Observatory (IDDO); University of Oxford, Centre for Tropical Medicine and Global Health, Nuffield Department of Clinical Medicine</p> <p>Siddiqui, Niyamat; Rajendra Memorial Research Institute of Medical Sciences (RMRIMS)</p> <p>Naylor, Caitlin; Infectious Diseases Data Observatory (IDDO); University of Oxford, Centre for Tropical Medicine and Global Health, Nuffield Department of Clinical Medicine</p> <p>Wilson, James; Infectious Diseases Data Observatory (IDDO); University of Oxford, Centre for Tropical Medicine and Global Health, Nuffield Department of Clinical Medicine</p> <p>Buck, Gemma; Infectious Diseases Data Observatory (IDDO); University of Oxford, Centre for Tropical Medicine and Global Health, Nuffield Department of Clinical Medicine</p> <p>Rahi, Manju; Indian Council of Medical Research (ICMR)</p> <p>Alves, Fabiana; Drugs for Neglected Disease Initiative</p> <p>Malaviya, Paritosh; Banaras Hindu University, Infectious Disease Research Laboratory, Department of Medicine, Institute of Medical Sciences</p> <p>Sundar, Shyam; Banaras Hindu University, Infectious Disease Research Laboratory, Department of Medicine, Institute of Medical Sciences</p> <p>Ritmeijer, Koert; Médecins Sans Frontières</p> <p>Stepniowska, Kasia; Infectious Diseases Data Observatory (IDDO); University of Oxford, Centre for Tropical Medicine and Global Health, Nuffield Department of Clinical Medicine</p> <p>Pandey, Krishna; Rajendra Memorial Research Institute of Medical Sciences (RMRIMS)</p> <p>Guérin, Philippe J.; Infectious Diseases Data Observatory (IDDO); University of Oxford, Centre for Tropical Medicine and Global Health, Nuffield Department of Clinical Medicine</p> <p>Musa, Ahmed; University of Khartoum, Institute of Endemic Diseases</p> |

1  
2  
3  
4  
5  
6  
7  
8  
9  
10  
11  
12  
13  
14  
15  
16  
17  
18  
19  
20  
21  
22  
23  
24  
25  
26  
27  
28  
29  
30  
31  
32  
33  
34  
35  
36  
37  
38  
39  
40  
41  
42  
43  
44  
45  
46  
47  
48  
49  
50  
51  
52  
53  
54  
55  
56  
57  
58  
59  
60

|           |                                                                                                      |
|-----------|------------------------------------------------------------------------------------------------------|
| Keywords: | Anaemia < HAEMATOLOGY, EPIDEMIOLOGY, INFECTIOUS DISEASES,<br>Tropical medicine < INFECTIOUS DISEASES |
|           |                                                                                                      |

SCHOLARONE™  
Manuscripts

1  
2  
3 1 Haematological dynamics following treatment of visceral leishmaniasis: a  
4  
5 2 protocol for systematic review and individual participant data (IPD) meta-  
6  
7  
8 3 analysis  
9

10 4 Abdalla Munir<sup>1,2,3</sup>, Prabin Dahal<sup>1,2§</sup>, Rishikesh Kumar<sup>4</sup>, Sauman Singh-Phulgenda<sup>1,2</sup>, Niyamat  
11  
12 5 Ali Siddiqui<sup>4</sup>, Caitlin Naylor<sup>1,2</sup>, James Wilson<sup>1,2</sup>, Gemma Buck<sup>1,2</sup>, Manju Rahi<sup>5</sup>, Fabiana Alves<sup>6</sup>,  
13  
14 6 Paritosh Malaviya<sup>7</sup>, Shyam Sundar<sup>7</sup>, Koert Ritmeijer<sup>8</sup>, Kasia Stepniewska<sup>1,2</sup>, Krishna Pandey<sup>4</sup>,  
15  
16 7 Phillipe J Guerin<sup>1,2§</sup>, Ahmed Musa<sup>3§</sup>  
17  
18  
19  
20  
21 8

22 9 <sup>1</sup>Infectious Diseases Data Observatory (IDDO), Oxford, UK

23  
24 10 <sup>2</sup>Centre for Tropical Medicine and Global Health, Nuffield Department of Clinical Medicine,  
25  
26 11 University of Oxford, Oxford, UK

27  
28 12 <sup>3</sup>Institute of Endemic Diseases, University of Khartoum, Khartoum, Sudan

29  
30 13 <sup>4</sup>Rajendra Memorial Research Institute of Medical Sciences (RMRIMS), Patna, India

31  
32 14 <sup>5</sup>Indian Council of Medical Research (ICMR), New Delhi, India

33  
34 15 <sup>6</sup>Drugs for Neglected Diseases initiative, Geneva, Switzerland

35  
36 16 <sup>7</sup>Infectious Disease Research Laboratory, Department of Medicine, Institute of Medical  
37  
38 17 Sciences, Banaras Hindu University, Varanasi, India

39  
40 18 <sup>8</sup>Médecins Sans Frontières, Amsterdam, Netherlands  
41  
42  
43  
44

45 21 <sup>§</sup>Correspondence: [prabin.dahal@iddo.org](mailto:prabin.dahal@iddo.org), [musaam2003@yahoo.co.uk](mailto:musaam2003@yahoo.co.uk)  
46  
47  
48  
49  
50  
51  
52  
53  
54  
55  
56  
57  
58  
59  
60

**Authors' email:**

22  
23 AM [abdalla.munir@iddo.org](mailto:abdalla.munir@iddo.org)  
24 PD [prabin.dahal@iddo.org](mailto:prabin.dahal@iddo.org)  
25 RK [rishikeshkumar@live.in](mailto:rishikeshkumar@live.in)  
26 SSP [sauman.singh@iddo.org](mailto:sauman.singh@iddo.org)  
27 NAS [niyamatalisiddiqui@yahoo.com](mailto:niyamatalisiddiqui@yahoo.com)  
28 CN [caitlin.naylor@iddo.org](mailto:caitlin.naylor@iddo.org)  
29 JW [james.wilson@iddo.org](mailto:james.wilson@iddo.org)  
30 GB [gemma.buck@iddo.org](mailto:gemma.buck@iddo.org)  
31 MR [drmanjurahi@gmail.com](mailto:drmanjurahi@gmail.com)  
32 PM [paritosh\\_malaviya@yahoo.com](mailto:paritosh_malaviya@yahoo.com)  
33 FA [falves@dndi.org](mailto:falves@dndi.org)  
34 SS [drshyamsundar@hotmail.com](mailto:drshyamsundar@hotmail.com)  
35 KR [koert.ritmeijer@amsterdam.msf.org](mailto:koert.ritmeijer@amsterdam.msf.org)  
36 KS [kasia.stepniewska@iddo.org](mailto:kasia.stepniewska@iddo.org)  
37 PJG [philippe.guerin@iddo.org](mailto:philippe.guerin@iddo.org)  
38 KP [drkrishnapandey@yahoo.com](mailto:drkrishnapandey@yahoo.com)

39

40

41

## 42 **Abstract**

43  
44 **Introduction:** Visceral leishmaniasis (VL) is a parasitic disease with an estimated 50,000 to  
45 90,000 new cases occurring annually. Anaemia is the most common haematological  
46 manifestation of visceral leishmaniasis (VL). However, the evolution of different  
47 haematological characteristics following treatment remains poorly understood. An  
48 individual participant data meta-analysis (IPD-MA) is planned to characterise the  
49 haematological dynamics in VL patients.

50  
51 **Methods and analysis:** The Infectious Diseases Data Observatory (IDDO) VL data platform is  
52 a global repository of IPD from therapeutic studies identified through a systematic search of  
53 published literature (PROSPERO registration: CRD42021284622). The platform currently  
54 holds datasets from clinical trials standardised to a common data format. Contacting  
55 authors and principal investigators of the studies indexed in the IDDO VL data platform  
56 meeting the eligibility criteria for inclusion in this IPD-MA were invited to be part of the  
57 collaborative IPD-MA. Mixed effects multivariable regression models will be constructed to  
58 identify determinants of haematological parameters by taking clustering within study-sites  
59 into account.

60  
61 **Ethics and dissemination:** The results of this analysis will be disseminated at conferences,  
62 IDDO website and any peer-reviewed publication arising will be made open source. Findings  
63 of this research will be critically important for the control programmes at regional/global  
64 levels, policy makers and groups developing new VL treatment.

65

1  
2  
3 66 **PROSPERO registration:** The systematic review component of the IPD-MA has the following  
4  
5

6 67 PROSPERO registration: CRD42021284622.  
7  
8

9 68  
10

11 69 **Keywords**  
12

13 70 Visceral Leishmaniasis; Kala-azar; Statistical Analysis Plan, meta-analysis, individual  
14

15 71 participant data; anaemia, haemoglobin; platelets, white blood cells, red blood cells  
16  
17

18 72  
19

20 73 **Word count: 2841 (main text); abstract (220)**  
21  
22

23 74  
24

25 75  
26

27 76  
28  
29  
30  
31  
32  
33  
34  
35  
36  
37  
38  
39  
40  
41  
42  
43  
44  
45  
46  
47  
48  
49  
50  
51  
52  
53  
54  
55  
56  
57  
58  
59  
60

1  
2  
3 77 ***Strengths and limitations of this study***  
4  
5

- 6 78 • Visceral Leishmaniasis clinical trials are relatively small, which limits the ability to  
7  
8  
9 79 identify predictors associated with it any clinical outcomes in any single study. An  
10  
11 80 individual participant data (IPD-MA) will increase the statistical power to detect the  
12  
13 81 predictors and moderators of associated with evolution of haemoglobin.  
14  
15  
16 82  
17  
18 83 • The identification of studies eligible for inclusion in the IPD-MA has been made through  
19  
20  
21 84 a comprehensive literature search of all published studies since 1980 with pre-defined  
22  
23 85 inclusion-exclusion criteria.  
24  
25  
26 86  
27  
28 87 • This IPD-MA will utilise the VL repository of individual participant data hosted by  
29  
30  
31 88 Infectious Diseases Data Observatory (IDDO VL data platform). A major strength of this  
32  
33 89 study is that data on the IDDO VL data platform is harmonised to a common standard  
34  
35 90 based on an extensive consultation with the VL research community.  
36  
37  
38 91  
39  
40 92 • Retrieval of data from trials published prior to 2000 can be a major challenge.  
41  
42  
43  
44  
45  
46  
47  
48  
49  
50  
51  
52  
53  
54  
55  
56  
57  
58  
59  
60



## 93 Introduction

94 Anaemia is the most common haematological manifestation of Visceral Leishmaniasis  
95 (VL)[1]. In patients with VL, anaemia can arise due to one or more associated factors:  
96 sequestration and haemolysis of red blood cells in the spleen associated with hypersplenism,  
97 bone marrow suppression caused by nutritional deficiencies such as iron, vitamin B12 and  
98 folate deficiencies, or due to clotting dysfunction leading to blood loss [1–5]. At the time of  
99 clinical diagnosis, haemoglobin levels are often around 7–10 g/dL but can be as low as 4 g/dL  
100 [1]. The severity of anaemia depends on the duration of clinical illness and can be exacerbated  
101 by comorbidities and iron deficiency [6,7].

102 After treatment with an antileishmanial drug, haematological improvement generally  
103 occurs within a few weeks with significant recovery expected within 4–6 weeks [3]. The  
104 trajectory of haematological recovery may be affected by patients' age or initial parasite load  
105 [8], but the influence of drug regimen and other patient characteristics remains poorly  
106 understood. To characterise the haematological changes in VL after treatment, and  
107 understand the role of host, parasite and drug related characteristics, we propose to  
108 undertake an individual participant data meta-analysis (IPD-MA) of therapeutic studies.

## 109 Objectives

110 The objectives of this IPD-MA are:

- 111 1. To identify the determinants of haemoglobin concentration at enrolment, at initial  
112 cure assessment and at definitive cure assessment
- 113 2. To characterise the haemoglobin dynamics following treatment
- 114 3. To identify the determinants of anaemia or severe anaemia at enrolment, at initial  
115 cure assessment and at definitive cure assessment

- 1  
2  
3 116 4. To describe white blood cells and platelets dynamics following treatment (data  
4  
5  
6 117 permitting)  
7  
8 118 5. To identify predictors of blood transfusion during treatment or follow-up (if  
9  
10 119 available)

## 120 **Methods and analysis: Patients, interventions and outcomes**

### 121 **Elements of the research aim (PICOT)**

122 *Population:* Any patient enrolled in an interventional study with a confirmed or suspected  
123 diagnosis of VL defined by serological and/or parasitological testing.

124 *Interventions:* Any antileishmanial therapy

125 *Comparator:* Not restricted by the use of a comparator drug

126 *Outcome:* At least one of the following outcomes reported: anaemia (or haemoglobin  
127 measurements) at enrolment, anaemia and other haematological measurements at any  
128 post-baseline time-points

129 *Time:* Studies published on or after 1980

### 131 **Criteria for study eligibility**

132 Studies in the IDDO VL data platform [9] will be deemed eligible for the purpose of this  
133 analysis if they meet the following criteria:

- 134 • Prospective clinical efficacy studies on patients with confirmed or suspected VL  
135 either using microscopy/serology/molecular method (i.e. clinical diagnosis followed  
136 by a confirmatory method)

- 1  
2  
3 137 • Information is available on treatment regimen including drug, dose, and duration  
4  
5  
6 138 • Data on anaemia (or either haemoglobin or haematocrit measurements) measured  
7  
8 139 at enrolment  
9

10  
11 140 ***Desirable criteria***  
12

- 13  
14 141 • Methodology used for haematological quantification, e.g. name of devices  
15  
16 142 • Information regarding if blood transfusion were given before or after treatment  
17  
18 143 initiation  
19  
20  
21 144 • Information of co-administration of iron supplement  
22  
23

24 145  
25

26  
27 146 ***Criteria for participant eligibility***  
28

29  
30 147 The following minimum information are required for participants from each of the identified  
31  
32 148 studies for inclusion in the IPD-MA analysis:  
33

- 34  
35  
36 149 • Details of antileishmanial treatment(s) administered  
37  
38 150 • Baseline information on age and gender  
39  
40  
41 151 • Outcome is recorded  
42  
43

44 152  
45

46  
47 153 **Outcomes**  
48

49  
50 154 ***Outcomes and definitions:***  
51

52  
53 155 **Primary outcome:** The primary endpoint is the haemoglobin concentration measured at any  
54  
55 156 time-period during the treatment and follow-up phase  
56  
57

58  
59 157 **Secondary outcomes:** The following endpoints are identified as secondary  
60

1  
2  
3 158 • Anaemia and severe anaemia at baseline, at the time of initial cure assessment and  
4  
5  
6 159 at the time of definitive cure assessment  
7

8 160 • White blood cells (WBC) at baseline and at any time during the treatment and  
9  
10  
11 161 follow-up  
12

13 162 • Platelets count at baseline and at any time during the treatment and follow-up  
14

15 163 • Requirement of blood transfusion during treatment or follow-up (if available)  
16  
17

18  
19 164 Anaemia will be defined following the WHO guidelines [10]. The timing of initial cure  
20  
21 165 assessment would typically take place within 28 days of treatment completion but this  
22  
23 166 varies slightly across studies; assessments undertaken between 15 to 60 days will be  
24  
25  
26 167 considered as time of initial cure assessment. Similarly, the timing of definitive cure  
27  
28 168 assessment will vary according to study design and hence assessments made between 5 to 7  
29  
30  
31 169 months will be considered as 6 months.  
32  
33

34 170  
35  
36

## 37 171 **Statistical methods**

### 38 39 40 172 **Identification of relevant studies**

41  
42  
43 173 We searched all the articles indexed in the open-access Infectious Diseases Data  
44  
45 174 Observatory (IDDO) visceral leishmaniasis clinical trials library [11]. The IDDO VL clinical  
46  
47  
48 175 trials library is based on a living systematic review and the database is continually updated  
49  
50 176 every six months in accordance with the Preferred Reporting Items for Systematic-Reviews  
51  
52 177 and Meta-Analyses (PRISMA) guidelines [12]. The trial library indexes publications identified  
53  
54  
55 178 from the following databases: PubMed, Embase, Scopus, Web of Science, Cochrane,  
56  
57  
58 179 clinicaltrials.gov, WHO ICTRP, Global Index Medicus, IMEMR, IMSEAR, and LILACS. For this  
59  
60

1  
2  
3 180 current review, the search includes all clinical trials published between 1st of Jan 1980 and  
4  
5  
6 181 2nd of May 2021. Details of the search strategy adopted is described elsewhere [12]. Studies  
7  
8 182 indexed in the IDDO VL library will be eligible for inclusion in this review if they meet the  
9  
10 183 inclusion and exclusion criteria outlined above. This review is not limited by language.

#### 13 14 184 **Collating IPD**

15  
16 185 Principal investigators and the corresponding authors of the eligible studies  
17  
18 186 identified from IDDO VL LSR were invited to share IPD. At least two emails will be sent out in  
19  
20  
21 187 case of non-response. Researchers agreeing to the terms and conditions of the submission  
22  
23 188 were invited to upload anonymised IPD to the IDDO repository through a secure web portal  
24  
25  
26 189 [9]. Data in the IDDO VL platform are fully pseudonymised to protect personal information  
27  
28 190 and patient privacy.

#### 30 31 191 **Data management**

32  
33 192 Raw data from individual studies shared with IDDO are currently being standardised  
34  
35  
36 193 using the Clinical Data Interchange Standards Consortium (CDISC) compliant curation  
37  
38 194 standards [13]. Investigators will be further contacted for validation or clarification, if  
39  
40  
41 195 required, and individual study protocols will be requested. On standardisation, the data will  
42  
43 196 be stored in a relational database of several tables containing information on drug regimen,  
44  
45  
46 197 parasitological, clinical, and haematological assessments and therapeutic outcomes.

## 198 **Statistical methods for analysis of primary and secondary outcomes**

### 199 **Descriptive summary of the studies included**

200 Summary of included studies will be presented with respect to study location, years  
201 of study, study population, duration of follow-up, drug regimen, methodology for diagnosis,  
202 supervision of drug administration or treatment adherence (if available), methods and  
203 devices used for haematology measurements.

### 204 **Summary of the participants included**

205 Summary of baseline characteristics of the participants included in the analysis will  
206 be presented for each study, by region and overall. The following will be presented: age;  
207 weight, parasite grade on enrolment, presence of fever (body temperature > 37.5 degrees  
208 Celsius), haemoglobin (or haematocrit), anaemia or severe anaemia as defined using the  
209 WHO definitions [10], spleen size, treatment, total mg/kg dose, and supervision of drug  
210 administration. The number of available patients will be summarised for all variables,  
211 proportions will be used for categorical or binary variables, and mean and standard  
212 deviation (or median and interquartile range) will be used for continuous variables.

### 214 **Analysis of the primary endpoint**

215 Separate linear mixed effect regression models will be undertaken to identify  
216 predictors of haemoglobin concentration at baseline, at the time of initial cure assessment  
217 and at the time of assessment of definitive cure in a one-stage IPD meta-analysis. The  
218 regression models constructed at the time of initial and final cure assessments will adjust for  
219 the baseline measurements of haemoglobin as covariates along with the drug regimen.

1  
2  
3 220 If repeated haemoglobin measurements are available for more than 3 time points, the  
4  
5  
6 221 longitudinal haemoglobin profile will be characterised using a linear mixed effects regression  
7  
8 222 model by considering time as a continuous variable. Fractional polynomials will be used to  
9  
10 223 explore any non-linear relationship in the evolution of haemoglobin concentration. If there  
11  
12  
13 224 are few numbers of time-points, then time will be considered as a discrete variable (three  
14  
15 225 time-points: baseline, day 30, and day 180) in the regression model.  
16  
17

18 226 The difference between haemoglobin concentration at baseline and at the time of  
19  
20 227 evaluation of definitive cure status (usually at day 180) will be used to quantify the absolute  
21  
22  
23 228 mean disease attributed haematological fall. The difference between haemoglobin  
24  
25  
26 229 concentration at baseline and at the end of the active treatment phase (day 30) will be used  
27  
28 230 to characterise if there is any drug attributed haematological fall.  
29  
30

31 231 Further description of candidate predictors and multivariable modelling is described  
32  
33  
34 232 in next.  
35  
36

### 37 233 **Candidate predictors and core set**

38  
39

40 234 The following variables will be considered for inclusion in the analysis of primary and  
41  
42 235 secondary endpoints.  
43  
44

45 236 The following host variables are considered: age, gender, body weight, nutritional status,  
46  
47 237 comorbidity status (such as HIV), and duration of illness prior to study enrolment.  
48  
49

50 238 Nutritional status in children under 5 years of age will be assessed using standardised age,  
51  
52 239 weight, height and gender specific growth reference standards according to the WHO 2006  
53  
54 240 recommendations using igrowup Stata package [14] (or equivalent library will in R be used).  
55  
56

57 241 Anthropometric indicators include weight-for-age (WAZ), height-for-age (HAZ), and weight-  
58  
59  
60

1  
2  
3 242 for-height (WHZ). The nutritional status of a child will be given as a Z-score and classified as  
4  
5  
6 243 stunted, underweight or wasted as defined in the WHO guidelines [14].  
7

8  
9 244 The following parasite related baseline factors will be considered: parasite load and  
10  
11 245 information regarding the nature of infection (primary vs. previously treated cases). Any  
12  
13 246 cases described as previously untreated (or “fresh”) cases for leishmaniasis will be  
14  
15  
16 247 considered as primary VL.  
17

18  
19 248 The following drug related variables will be considered for inclusion in analysis: drug  
20  
21 249 regimen, mg/kg total dose (or target dose), concomitant infections.  
22

23  
24  
25 250 The following study or arm level variables will be considered in the analysis of primary and  
26  
27 251 secondary endpoints: geographical region, country, study site, and calendar year of the  
28  
29 252 study conduct.  
30

31  
32  
33 253 The following covariates will be examined in the regression model and considered as core  
34  
35 254 predictor set: age, sex, baseline parasite density, HIV co-infection, and geographical region,  
36  
37 255 baseline haematological measurements. These variables along with the drug regimen will  
38  
39  
40 256 form the minimal adjustment set for assessment of other risk factors and will be kept in the  
41  
42 257 regression model regardless of statistical significance [15].  
43  
44

#### 45 258 **Considerations for multivariable model construction**

46  
47  
48  
49 259 Multivariable model construction will follow the recommendations of Heinze et al (2017)  
50  
51 260 [16]. Nested models will be compared by assessing the change in log-likelihood estimates  
52  
53 261 and Akaike’s information criterion (AIC) will be used for comparing competing non-nested  
54  
55  
56 262 models. The functional form of the continuous variables will be determined using  
57  
58 263 multivariable fractional polynomials [17] or restricted cubic splines [15]. Stability  
59  
60



1  
2  
3 264 investigations will be undertaken to account for uncertainty introduced in multivariable  
4  
5  
6 265 modelling through bootstrap resampling [16].  
7

### 8 9 266 **Handling missing data**

10  
11  
12 267 To assess the impact of missing data, sensitivity analysis will be performed to see if  
13  
14 268 the main conclusions are affected or not by the exclusion of patients with missing data using  
15  
16 269 multiple imputation [18]. The imputation model will include all the variables in the target  
17  
18 270 analysis and additional auxiliary variables. The target analysis will be carried out in each of  
19  
20 271 the completed (observed plus imputed values) datasets and the estimates will be combined  
21  
22 272 across the imputed datasets using Rubin's combination rules [18].  
23  
24  
25  
26

### 27 273 **Sensitivity analyses**

28  
29 274 Two sensitivity analyses will be carried using resampling techniques to assess model  
30  
31 275 stability. Bootstrap resampling will be used to assess the robustness of the derived  
32  
33 276 estimates and its variance using the recommendations in Heinze et al (2017) [16]. In the  
34  
35 277 second analysis, model will be refitted with one study excluded at a time, and a coefficient  
36  
37 278 of variation around the parameter estimates will be calculated. This would identify any  
38  
39 279 influential studies, that is, studies with unusual results (due to variations in methodology,  
40  
41 280 patient population, and so on) that affect the overall pooled analysis findings.  
42  
43  
44  
45  
46  
47  
48  
49  
50  
51  
52  
53  
54  
55  
56  
57  
58  
59  
60

## 281 **Analysis of secondary endpoints**

### 282 **Anaemia and severe anaemia at baseline, at test of initial cure and at end of the study** 283 **follow-up**

284 A mixed effects logistic regression model will be constructed to identify the  
285 predictors associated with anaemia (or severe anaemia) at baseline using a one-stage IPD-  
286 MA. Random effects for the study sites will be used to adjust for study-site effect [19].  
287 Potential non-linear relationships between continuous predictors and the outcome will be  
288 investigated using multivariable fractional polynomials [20]. Similar analysis will be  
289 undertaken for anaemia (or severe anaemia) at the time of initial cure, and at the end of the  
290 study follow-up. Multivariable model construction will be undertaken as outlined for the  
291 primary endpoint.

### 292 **WBC and Platelets (if data are available)**

293 The distribution of WBC and platelets will be summarised at baseline, at the time of  
294 initial cure assessment and at the time of the definitive cure assessment. If data are  
295 available, predictors associated with WBC (or platelet counts) will be carried out using a  
296 mixed effects linear regression (appropriate transformation will be used if distribution is  
297 skewed). Statistical modelling will be undertaken as for the primary endpoint.

### 298 **Blood transfusion during the study follow-up (if data are available)**

299 Predictors associated with requirement of blood transfusion at any stage during the  
300 study period will be identified (if data are available) using a mixed effects logistic regression.  
301 Multivariable regression modelling will be undertaken as described for the other endpoints.

302

### 303 **Subgroup analyses**

304 The following two sub-group analyses are planned. Patients living with HIV who are treated  
305 for VL typically have worse outcomes and higher mortality risk than those who are not living  
306 with HIV [21,22]. A separate sub-group analysis will be carried out among patients with  
307 defined VL-HIV coinfections (data permitting). There is a known regional variation in  
308 treatment response [23]; a separate analysis could be undertaken for each of the  
309 geographical regions.

### 310 **Risk of bias assessment in included studies**

311 To examine the risk of bias in IPD-MA, the first four domains of the quality In  
312 prognosis studies (QUIPS) tool and the first three domains of the prediction model risk of  
313 bias assessment tool (PROBAST) will be considered as recommended in Riley et al (2021)  
314 [15]. The relevant domains from the QUIPS checklist are study participation, study attrition,  
315 prognostic factor measurement, and outcome measurement, and the relevant domains  
316 from PROBAST checklist are participant selection, prognostic factors, and outcomes. Two  
317 reviewers will independently assess the risk of bias in the studies included in the analysis.

318 Risk of bias results will be incorporated into analyses by conducting subgroup  
319 analyses among studies with overall low risk of bias or by conducting formal interaction  
320 analyses with risk of bias responses [24].

### 321 **Assessment of risk of potential bias in missing studies**

322 Despite best possible efforts, it is anticipated that raw data from all the identified  
323 studies will not be available. The characteristics of patient population and study meta-data  
324 from the missing studies will be summarised to explore if the missing studies are

1  
2  
3 325 systematically different from the studies that are included in the meta-analysis. A two-stage  
4  
5 326 IPD may be conducted if sufficient details (or any covariate adjustment) are reported in the  
6  
7  
8 327 original studies.  
9

### 10 11 328 **Further development of statistical analysis plan** 12

13  
14 329 The main analysis is planned as described above. Modification or additional analyses  
15  
16 330 may be required as the data collection progresses. An updated statistical analysis plan will  
17  
18  
19 331 be available on the IDDO study group website [25].  
20

### 21 22 332 **Software** 23

24  
25 333 All the analysis will be carried out using R software or Stata 17 software [26,27]. Use  
26  
27  
28 334 of any other data analysis tools will not change the statistical analysis plan.  
29

### 30 31 335 **Ethics and dissemination** 32

33  
34 336 This IPD-MA meets the criteria for waiver of ethical review as defined by the Oxford  
35  
36 337 Tropical Research Ethics Committee (OxTREC) granted to IDDO, as the research consists of  
37  
38  
39 338 secondary analysis of existing anonymised data. Ethical approval was granted to each study  
40  
41 339 included in this pooled analysis by their respective ethics committees. This IPD-MA will  
42  
43 340 address research questions similar to that of included studies. Findings of this IPD-MA will  
44  
45 341 be reported in open-access, peer-reviewed journals following the PRISMA-IPD guidelines  
46  
47  
48 342 [28].  
49

### 50 51 52 343 **Patient and public involvement** 53

54  
55 344 The research questions considered in this IPD-MA is based on a research agenda  
56  
57 345 developed by the global VL research community [29]. The design and development of this  
58  
59  
60 346 IPD-MA were done by the study authors only and no patient was involved at any stage.

## 347 Discussion

348 Anaemia is the most common haematological manifestation of visceral leishmaniasis  
349 (VL). Despite this, the impact of treatment on different haematological parameters remains  
350 to be fully understood. The aim of this IPD meta-analysis is to explore the dynamics of  
351 different haematological parameters during the treatment and the convalescence phase of  
352 the disease. IPD-MA is being used increasingly to explore factors affecting treatment  
353 outcomes which otherwise would not be possible through standard aggregate data meta-  
354 analysis [30].

355 This pooled analysis will provide critical information regarding the trajectory of  
356 haematological recovery among VL patients. The assessment of the host, parasite and drug  
357 determinants that influence the haematological response can provide evidence-based  
358 guidance for optimal case management and monitoring drug safety. The IDDO VL LSR, which  
359 is a comprehensive library of all published studies since 1980 has been used for  
360 identification of the studies eligible for this IPD-MA. A major strength of this study is that  
361 data from several studies will be harmonised to a common standard based on an extensive  
362 consultation with the VL research community [13], thus allowing us to address some of the  
363 methodological sources of heterogeneity. A major challenge is that a substantial proportion  
364 of the studies in the IDDO library were conducted prior to the year 2000; the retrieval of  
365 data from historical trials is a major challenge.

366 This IPD-MA will characterise the haematological profile of VL patients at enrolment  
367 and at the time-points of initial and definitive cure assessments. Findings of this research  
368 will generate important information regarding the evolution of different haematological  
369 characteristics.

1  
2  
3 370 **Authors' contributions**  
4  
5

6 371 All authors listed were responsible for the study conceptualisation. AM, PD, PJG, AM, KS  
7  
8 372 wrote the first draft of the manuscript. All authors were involved in reading, revising it  
9  
10  
11 373 critically, editing and approving the final manuscript.  
12  
13

14 374  
15  
16

17 375 **Funding**  
18  
19

20 376 This work is funded by a Bill & Melinda Gates Foundation grant to the Infectious Diseases  
21  
22  
23 377 Data Observatory, Oxford University, UK (Recipient: Prof. Philippe Guerin; ref: INV-004713).  
24  
25

26 378 **Conflict of Interest**  
27  
28

29 379 None  
30  
31

32 380 **Data Availability**  
33  
34

35 381 N/A as this is an analysis protocol.  
36  
37  
38  
39  
40  
41  
42  
43  
44  
45  
46  
47  
48  
49  
50  
51  
52  
53  
54  
55  
56  
57  
58  
59  
60

## References

1. Boelaert M, Sundar S. Leishmaniasis. 23rd ed. In: Farrar J, Hotez PJ, Junghanss T, Kang G, Lalloo D, White NJ, editors. *Manson's Tropical Diseases*. 23rd ed. Elsevier Health Sciences; 2013. pp. 631–651.
2. Goto Y, Cheng J, Omachi S, Morimoto A. Prevalence, severity, and pathogenesis of anemia in visceral leishmaniasis. *Parasitol Res*. 2017;116: 457–464. doi:10.1007/s00436-016-5313-x
3. Varma N, Naseem S. Hematologic changes in visceral Leishmaniasis/Kala Azar. *Indian J Hematol Blood Transfus*. 2010;26: 78–82. doi:10.1007/s12288-010-0027-1
4. Kager PA, Rees PH. Haematological investigations in visceral leishmaniasis. *Trop Geogr Med*. 1986;38: 371–79.
5. Woodruff AW, Topley E, Knight R, Downie CGB. The Anaemia of Kala Azar. *Br J Haematol*. 1972;22: 319–329. doi:10.1111/j.1365-2141.1972.tb05678.x
6. Thakur CP. Epidemiological, clinical and therapeutic features of Bihar kala-azar (including post kala-azar dermal leishmaniasis). *Trans R Soc Trop Med Hyg*. 1984;78: 391–398. doi:10.1016/0035-9203(84)90131-7
7. Chulay JD, Bhatt SM, Muigai R, Ho M, Gachihi G, Were JBO, et al. A Comparison of 3 Dosage Regimens of Sodium Stibogluconate in the Treatment of Visceral Leishmaniasis in Kenya. *J Infect Dis*. 1983;148: 148–155.
8. Shiferaw E, Murad F, Tigabie M, Abebaw M, Alemu T, Abate S, et al. Hematological profiles of visceral leishmaniasis patients before and after treatment of anti-leishmanial drugs at University of Gondar Hospital; *Leishmania Research and*

- 1  
2  
3 404 Treatment Center Northwest, Ethiopia. BMC Infect Dis. 2021;21: 1–7.  
4  
5  
6 405 doi:10.1186/s12879-021-06691-7  
7  
8  
9 406 9. Infectious Diseases Data Observatory. Visceral leishmaniasis Data Inventory. In:  
10  
11 407 iddo.org [Internet]. 2023 [cited 27 Feb 2023]. Available:  
12  
13 408 <https://www.iddo.org/document/visceral-leishmaniasis-data-inventory>  
14  
15  
16 409 10. Vitamin and Mineral Nutrition Information System. World Health Organization.  
17  
18  
19 410 Haemoglobin concentrations for the diagnosis of anaemia and assessment of severity.  
20  
21 411 In: Geneva, Switzerland, World Health Organization (WHO/NMH/NHD/MNM/11.1).  
22  
23 412 2011. doi:2011  
24  
25  
26  
27 413 11. Infectious Diseases Data Observatory. VL Surveyor. In: [www.iddo.org](http://www.iddo.org) [Internet]. 2020  
28  
29 414 [cited 17 Sep 2020]. Available: <https://www.iddo.org/vlSurveyor/#0>  
30  
31  
32  
33 415 12. Singh-Phulgenda S, Rashan S, Harriss E, Prabin D, Naylor C, Brack M, et al. Infectious  
34  
35 416 Diseases Data Observatory (IDDO) Visceral Leishmaniasis Library of Clinical  
36  
37 417 Therapeutic Studies : A Protocol for a Living Systematic Review of Clinical Studies. In:  
38  
39 418 Research Square PREPRINT (Version 1). 2022. doi:[https://doi.org/10.21203/rs.3.rs-](https://doi.org/10.21203/rs.3.rs-1159661/v1)  
40  
41 419 [1159661/v1](https://doi.org/10.21203/rs.3.rs-1159661/v1) License:  
42  
43  
44  
45 420 13. Infectious Diseases Data Observatory. New global collaboration developing standards  
46  
47 421 for standardised data collection across the VL research community. 2020 [cited 28  
48  
49 422 Feb 2023]. Available: [https://www.iddo.org/news/new-global-collaboration-](https://www.iddo.org/news/new-global-collaboration-developing-standards-standardised-data-collection-across-vl-research)  
50  
51 423 [developing-standards-standardised-data-collection-across-vl-research](https://www.iddo.org/news/new-global-collaboration-developing-standards-standardised-data-collection-across-vl-research)  
52  
53  
54  
55  
56 424 14. WHO Multicentre Growth Reference Study Group. WHO Child Growth Standards:  
57  
58 425 Length/height-for-age, weight-for-age, weight-for-length, weight-for-height and body  
59  
60



- 1  
2  
3 426 mass index-for-age: Methods and development. . Geneva World Heal Organ. 2006;  
4  
5  
6 427 312.  
7  
8  
9 428 15. Riley RD, Moons KGM, Debray TPA. IPD Meta-Analysis for Prognostic Factor Research.  
10  
11 429 In: Richard D. Riley, Jayne F. Tierney LAS, editor. Individual Participant Data Meta-  
12  
13 430 Analysis: A Handbook for Healthcare Research. John Wiley & Sons Ltd; 2021. pp. 421–  
14  
15 431 445. doi:10.1002/9781119333784.ch16  
16  
17  
18  
19 432 16. Heinze G, Wallisch C, Dunkler D. Variable selection – A review and recommendations  
20  
21 433 for the practicing statistician. *Biometrical J.* 2018;60: 431–449.  
22  
23 434 doi:10.1002/bimj.201700067  
24  
25  
26  
27 435 17. Sauerbrei W, Royston P, Binder H. Selection of important variables and determination  
28  
29 436 of functional form for continuous predictors in multivariable model building. *Stat*  
30  
31 437 *Med.* 2007;26: 5512–5528. doi:10.1002/sim.3148  
32  
33  
34  
35 438 18. White IR, Royston P, Wood AM. Multiple imputation using chained equations: Issues  
36  
37 439 and guidance for practice. *Stat Med.* 2011;30: 377–399. doi:10.1002/sim.4067  
38  
39  
40  
41 440 19. Glidden D V, Vittinghoff E. Modelling clustered survival data from multicentre clinical  
42  
43 441 trials. *Stat Med.* 2004;23: 369–88. doi:10.1002/sim.1599  
44  
45  
46 442 20. Royston P, Sauerbrei W. *Multivariable Model-Building: A Pragmatic Approach to*  
47  
48 443 *Regression Analysis based on Fractional Polynomials for Modelling Continuous*  
49  
50 444 *Variables. Multivariable Model-Building: A Pragmatic Approach to Regression Analysis*  
51  
52 445 *based on Fractional Polynomials for Modelling Continuous Variables.* John Wiley &  
53  
54 446 Sons, Ltd; 2008. p. pp: 71-98.  
55  
56  
57  
58  
59 447 21. World Health Organization. WHO guidelines for the treatment of visceral  
60

- 1  
2  
3 448 leishmaniasis in HIV co-infected patients in East Africa and South-East Asia. World  
4  
5  
6 449 Health OrganizationWorld Health Organization. Geneva, Switzerland; 2022.  
7  
8  
9 450 22. Singh-Phulgenda S, Rashan S, Harriss E, Dahal P, Naylor C, Brack M, et al. Infectious  
10  
11 451 diseases data observatory (IDDO) visceral leishmaniasis library of clinical therapeutic  
12  
13 452 studies: A protocol for a living systematic review of clinical studies. Wellcome Open  
14  
15  
16 453 Res. 2022;7: 155. doi:10.12688/wellcomeopenres.17739.1  
17  
18  
19 454 23. Alves F, Bilbe G, Blesson S, Goyal V, Monnerat S, Mowbray C, et al. Recent  
20  
21 455 Development of Visceral Leishmaniasis Treatments: Successes, Pitfalls, and  
22  
23 456 Perspectives. Clin Microbiol Rev. 2018;31: 1–30. doi:10.1128/CMR.00048-18  
24  
25  
26  
27 457 24. Levis B, Snell K, Takwoingi Y, Collins GS, Moons KG, Reitsma JB, Hooft L, Stewart LA,  
28  
29 458 Tierney JF RR. Evaluating risk of bias and applicability in individual participant data  
30  
31 459 meta-analyses. Advances in Evidence Synthesis: special issue Cochrane Database of  
32  
33 460 Systematic Reviews. 2020. p. (9 Suppl 1).  
34  
35 461 doi:https://doi.org/10.1002/14651858.CD202001  
36  
37  
38  
39  
40 462 25. Infectious Diseases Data Observatory. Anaemia among patients with visceral  
41  
42 463 leishmaniasis and haematological dynamics post treatment. 2022 [cited 27 Apr 2022].  
43  
44 464 Available: [https://www.iddo.org/anaemia-among-patients-visceral-leishmaniasis-](https://www.iddo.org/anaemia-among-patients-visceral-leishmaniasis-and-haematological-dynamics-post-treatment)  
45  
46 465 [and-haematological-dynamics-post-treatment](https://www.iddo.org/anaemia-among-patients-visceral-leishmaniasis-and-haematological-dynamics-post-treatment)  
47  
48  
49  
50 466 26. R Core Team. R: A language and environment for statistical computing. Vienna,  
51  
52 467 Austria; 2021. Available: <https://www.r-project.org/>.  
53  
54  
55  
56 468 27. StataCorp. Stata Statistical Software: Release 17. College Station, TX; 2021.  
57  
58  
59 469 28. Stewart LA, Clarke M, Rovers M, Riley RD, Simmonds M, Stewart G, et al. Preferred  
60

- 1  
2  
3 470 reporting items for a systematic review and meta-analysis of individual participant  
4  
5  
6 471 data: The PRISMA-IPD statement. JAMA - J Am Med Assoc. 2015;313: 1657–1665.  
7  
8 472 doi:10.1001/jama.2015.3656  
9  
10  
11 473 29. Infectious Diseases Data Observatory. Visceral leishmaniasis research agenda. In:  
12  
13  
14 474 2019 [Internet]. [cited 28 Feb 2023]. Available:  
15  
16 475 <https://www.iddo.org/vl/research/research-agenda>  
17  
18  
19 476 30. Riley RD, Lambert PC, Abo-Zaid G. Meta-analysis of individual participant data:  
20  
21  
22 477 Rationale, conduct, and reporting. BMJ. 2010;340: 521–525. doi:10.1136/bmj.c221  
23  
24  
25 478

# BMJ Open

## Haematological dynamics following treatment of visceral leishmaniasis: a protocol for systematic review and individual participant data (IPD) meta-analysis

|                               |                                                                                                                                                                                                                                                                                                                                                                                                                                                                                                                                                                                                                                                                                                                                                                                                                                                                                                                                                                                                                                                                                                                                                                                                                                                                                                                                                                                                                                                                                                                                                                                                                                                                                                                                                                                                                                                                                                                                                                                                                                                                                                                                                                                                                            |
|-------------------------------|----------------------------------------------------------------------------------------------------------------------------------------------------------------------------------------------------------------------------------------------------------------------------------------------------------------------------------------------------------------------------------------------------------------------------------------------------------------------------------------------------------------------------------------------------------------------------------------------------------------------------------------------------------------------------------------------------------------------------------------------------------------------------------------------------------------------------------------------------------------------------------------------------------------------------------------------------------------------------------------------------------------------------------------------------------------------------------------------------------------------------------------------------------------------------------------------------------------------------------------------------------------------------------------------------------------------------------------------------------------------------------------------------------------------------------------------------------------------------------------------------------------------------------------------------------------------------------------------------------------------------------------------------------------------------------------------------------------------------------------------------------------------------------------------------------------------------------------------------------------------------------------------------------------------------------------------------------------------------------------------------------------------------------------------------------------------------------------------------------------------------------------------------------------------------------------------------------------------------|
| Journal:                      | <i>BMJ Open</i>                                                                                                                                                                                                                                                                                                                                                                                                                                                                                                                                                                                                                                                                                                                                                                                                                                                                                                                                                                                                                                                                                                                                                                                                                                                                                                                                                                                                                                                                                                                                                                                                                                                                                                                                                                                                                                                                                                                                                                                                                                                                                                                                                                                                            |
| Manuscript ID                 | bmjopen-2023-074841.R1                                                                                                                                                                                                                                                                                                                                                                                                                                                                                                                                                                                                                                                                                                                                                                                                                                                                                                                                                                                                                                                                                                                                                                                                                                                                                                                                                                                                                                                                                                                                                                                                                                                                                                                                                                                                                                                                                                                                                                                                                                                                                                                                                                                                     |
| Article Type:                 | Protocol                                                                                                                                                                                                                                                                                                                                                                                                                                                                                                                                                                                                                                                                                                                                                                                                                                                                                                                                                                                                                                                                                                                                                                                                                                                                                                                                                                                                                                                                                                                                                                                                                                                                                                                                                                                                                                                                                                                                                                                                                                                                                                                                                                                                                   |
| Date Submitted by the Author: | 11-Oct-2023                                                                                                                                                                                                                                                                                                                                                                                                                                                                                                                                                                                                                                                                                                                                                                                                                                                                                                                                                                                                                                                                                                                                                                                                                                                                                                                                                                                                                                                                                                                                                                                                                                                                                                                                                                                                                                                                                                                                                                                                                                                                                                                                                                                                                |
| Complete List of Authors:     | <p>Munir, Abdalla; Infectious Diseases Data Observatory (IDDO); University of Oxford, Centre for Tropical Medicine and Global Health, Nuffield Department of Medicine</p> <p>Dahal, Prabin; University of Oxford, Centre for Tropical Medicine and Global Health, Nuffield Department of Medicine</p> <p>Kumar, Rishikesh; Rajendra Memorial Research Institute of Medical Sciences (RMRIMS)</p> <p>Singh-Phulgenda, Sauman; Infectious Diseases Data Observatory (IDDO); University of Oxford, Centre for Tropical Medicine and Global Health, Nuffield Department of Medicine</p> <p>Siddiqui, Niyamat; Rajendra Memorial Research Institute of Medical Sciences (RMRIMS)</p> <p>Naylor, Caitlin; Infectious Diseases Data Observatory (IDDO); University of Oxford, Centre for Tropical Medicine and Global Health, Nuffield Department of Medicine</p> <p>Wilson, James; Infectious Diseases Data Observatory (IDDO); University of Oxford, Centre for Tropical Medicine and Global Health, Nuffield Department of Medicine</p> <p>Buck, Gemma; Infectious Diseases Data Observatory (IDDO); University of Oxford, Centre for Tropical Medicine and Global Health, Nuffield Department of Medicine</p> <p>Rahi, Manju; Indian Council of Medical Research (ICMR)</p> <p>Alves, Fabiana; Drugs for Neglected Disease Initiative</p> <p>Malaviya, Paritosh; Banaras Hindu University, Infectious Disease Research Laboratory, Department of Medicine, Institute of Medical Sciences</p> <p>Sundar, Shyam; Banaras Hindu University, Infectious Disease Research Laboratory, Department of Medicine, Institute of Medical Sciences</p> <p>Ritmeijer, Koert; Médecins Sans Frontières</p> <p>Stepniewska, Kasia; Infectious Diseases Data Observatory (IDDO); University of Oxford, Centre for Tropical Medicine and Global Health, Nuffield Department of Medicine</p> <p>Pandey, Krishna; Rajendra Memorial Research Institute of Medical Sciences (RMRIMS)</p> <p>Guérin, Philippe J.; Infectious Diseases Data Observatory (IDDO); University of Oxford, Centre for Tropical Medicine and Global Health, Nuffield Department of Medicine</p> <p>Musa, Ahmed; University of Khartoum, Institute of Endemic Diseases</p> |

1  
2  
3  
4  
5  
6  
7  
8  
9  
10  
11  
12  
13  
14  
15  
16  
17  
18  
19  
20  
21  
22  
23  
24  
25  
26  
27  
28  
29  
30  
31  
32  
33  
34  
35  
36  
37  
38  
39  
40  
41  
42  
43  
44  
45  
46  
47  
48  
49  
50  
51  
52  
53  
54  
55  
56  
57  
58  
59  
60

|                                   |                                                                                                   |
|-----------------------------------|---------------------------------------------------------------------------------------------------|
| <b>Primary Subject Heading:</b>   | Infectious diseases                                                                               |
| <b>Secondary Subject Heading:</b> | Public health                                                                                     |
| <b>Keywords:</b>                  | Anaemia < HAEMATOLOGY, EPIDEMIOLOGY, INFECTIOUS DISEASES, Tropical medicine < INFECTIOUS DISEASES |
|                                   |                                                                                                   |

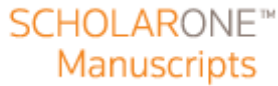

1  
2  
3 1 Haematological dynamics following treatment of visceral leishmaniasis: a  
4  
5  
6 2 protocol for systematic review and individual participant data (IPD) meta-  
7  
8 3 analysis  
9

10 4 Abdalla Munir<sup>1,2,3</sup>, Prabin Dahal<sup>1,2§</sup>, Rishikesh Kumar<sup>4</sup>, Sauman Singh-Phulgenda<sup>1,2</sup>, Niyamat  
11  
12 5 Ali Siddiqui<sup>4</sup>, Caitlin Naylor<sup>1,2</sup>, James Wilson<sup>1,2</sup>, Gemma Buck<sup>1,2</sup>, Manju Rahi<sup>5</sup>, Fabiana Alves<sup>6</sup>,  
13  
14 6 Paritosh Malaviya<sup>7</sup>, Shyam Sundar<sup>7</sup>, Koert Ritmeijer<sup>8</sup>, Kasia Stepniewska<sup>1,2</sup>, Krishna Pandey<sup>4</sup>,  
15  
16 7 Phillipe J Guerin<sup>1,2§</sup>, Ahmed Musa<sup>3§</sup>  
17  
18  
19  
20  
21 8

22 9 <sup>1</sup>Infectious Diseases Data Observatory (IDDO), Oxford, UK

23  
24 10 <sup>2</sup>Centre for Tropical Medicine and Global Health, Nuffield Department of Clinical Medicine,  
25  
26 11 University of Oxford, Oxford, UK

27  
28 12 <sup>3</sup>Institute of Endemic Diseases, University of Khartoum, Khartoum, Sudan

29  
30 13 <sup>4</sup>Rajendra Memorial Research Institute of Medical Sciences (RMRIMS), Patna, India

31  
32 14 <sup>5</sup>Indian Council of Medical Research (ICMR), New Delhi, India

33  
34 15 <sup>6</sup>Drugs for Neglected Diseases initiative, Geneva, Switzerland

35  
36 16 <sup>7</sup>Infectious Disease Research Laboratory, Department of Medicine, Institute of Medical  
37  
38 17 Sciences, Banaras Hindu University, Varanasi, India

39  
40 18 <sup>8</sup>Médecins Sans Frontières, Amsterdam, The Netherlands  
41  
42  
43  
44

45 21 <sup>§</sup>Correspondence: [prabin.dahal@ndm.ox.ac.uk](mailto:prabin.dahal@ndm.ox.ac.uk) & [musaam2003@yahoo.co.uk](mailto:musaam2003@yahoo.co.uk)  
46  
47  
48  
49  
50  
51  
52  
53  
54  
55  
56  
57  
58  
59  
60

22 **Authors' email:**

23 AbM [abdalla.munir@iddo.org](mailto:abdalla.munir@iddo.org)  
24 PD [prabin.dahal@iddo.org](mailto:prabin.dahal@iddo.org)  
25 RK [rishikeshkumar@live.in](mailto:rishikeshkumar@live.in)  
26 SSP [sauman.singh@iddo.org](mailto:sauman.singh@iddo.org)  
27 NAS [niyamatalisiddiqui@yahoo.com](mailto:niyamatalisiddiqui@yahoo.com)  
28 CN [caitlin.naylor@iddo.org](mailto:caitlin.naylor@iddo.org)  
29 JW [james.wilson@iddo.org](mailto:james.wilson@iddo.org)  
30 GB [gemma.buck@iddo.org](mailto:gemma.buck@iddo.org)  
31 MR [drmanjurahi@gmail.com](mailto:drmanjurahi@gmail.com)  
32 FA [falves@dndi.org](mailto:falves@dndi.org)  
33 PM [paritosh\\_malaviya@yahoo.com](mailto:paritosh_malaviya@yahoo.com)  
34 SS [drshyamsundar@hotmail.com](mailto:drshyamsundar@hotmail.com)  
35 KR [koert.ritmeijer@amsterdam.msf.org](mailto:koert.ritmeijer@amsterdam.msf.org)  
36 KS [kasia.stepniewska@iddo.org](mailto:kasia.stepniewska@iddo.org)  
37 KP [drkrishnapandey@yahoo.com](mailto:drkrishnapandey@yahoo.com)  
38 PJG [philippe.guerin@iddo.org](mailto:philippe.guerin@iddo.org)  
39 AhM [musaam2003@yahoo.co.uk](mailto:musaam2003@yahoo.co.uk)

## 43 **Abstract**

44  
45 **Introduction:** Visceral leishmaniasis (VL) is a parasitic disease with an estimated 30,000 new  
46 cases occurring annually. Despite anaemia being a common haematological manifestation of  
47 VL, the evolution of different haematological characteristics following treatment remains  
48 poorly understood. An individual participant data meta-analysis (IPD-MA) is planned to  
49 characterise the haematological dynamics in VL patients.

50  
51 **Methods and analysis:** The Infectious Diseases Data Observatory (IDDO) VL data platform is  
52 a global repository of individual participant data from therapeutic studies identified through  
53 a systematic search of published literature (PROSPERO registration: CRD42021284622). The  
54 platform currently holds datasets from clinical trials standardised to a common data format.  
55 Corresponding authors and principal investigators of the studies indexed in the IDDO VL  
56 data platform meeting the eligibility criteria for inclusion in this IPD-MA were invited to be  
57 part of the collaborative IPD-MA. Mixed effects multivariable regression models will be  
58 constructed to identify determinants of haematological parameters by taking clustering  
59 within study-sites into account.

60  
61 **Ethics and dissemination:** This IPD-MA meets the criteria for waiver of ethical review as  
62 defined by the Oxford Tropical Research Ethics Committee (OxTREC) granted to IDDO, as the  
63 research consists of secondary analysis of existing anonymised data (exempt granted on  
64 29th March 2023, OxTREC REF: Infectious Diseases Data Observatory (IDDO)). Ethics  
65 approval was granted by the ICMR-Rajendra Memorial Research Institute of Medical  
66 Sciences ethics committee (Letter no: RMRI/EC/30/2022) on 04-07-2022. The results of this



1  
2  
3 67 analysis will be disseminated at conferences, IDDO website and peer-reviewed publication  
4  
5  
6 68 in open-access journals. Findings of this research will be critically important for the control  
7  
8 69 programmes at regional/global levels, policy makers and groups developing new VL  
9  
10 70 treatment.

11  
12  
13 71  
14  
15 72 **PROSPERO registration:** The systematic review component of the IPD-MA has the following  
16  
17 73 PROSPERO registration: CRD42021284622.  
18  
19

20 74  
21  
22  
23 75 **Keywords**

24  
25 76 Visceral Leishmaniasis; Kala-azar; Statistical Analysis Plan, meta-analysis, individual  
26  
27 77 participant data; IPD-MA; anaemia, haemoglobin; platelets, white blood cells, red blood  
28  
29 78 cells  
30  
31

32 79  
33  
34  
35 80 **Word count: 2841 (main text); abstract (265)**  
36  
37  
38  
39  
40  
41  
42  
43  
44  
45  
46  
47  
48  
49  
50  
51  
52  
53  
54  
55  
56  
57  
58  
59  
60

1  
2  
3 81 ***Strengths and limitations of this study***  
4  
5

- 6 82 • An individual participant data meta-analysis (IPD-MA) is proposed to characterise the  
7  
8 evolution of haemoglobin and other haematological parameters during the study period;  
9 83  
10 this will overcome the limitations due to sample size issues.  
11 84  
12  
13  
14 85  
15  
16 86 • The identification of studies has been made through a comprehensive literature search  
17  
18 of all published studies since 1980 with a pre-defined inclusion-exclusion criterion.  
19 87  
20  
21 88  
22  
23 89 • A major strength of this IPD-MA is that it uses individual participant data hosted at  
24  
25 Infectious Diseases Data Observatory which has harmonised raw data to a common  
26 90  
27 standard based on an extensive consultation with the VL research community.  
28 91  
29  
30  
31 92  
32  
33 93 • Retrieval of data from trials published prior to 2000 can be a major challenge.  
34  
35  
36  
37  
38  
39  
40  
41  
42  
43  
44  
45  
46  
47  
48  
49  
50  
51  
52  
53  
54  
55  
56  
57  
58  
59  
60

## 94 Introduction

95 Anaemia is a common haematological manifestation of Visceral Leishmaniasis (VL).[1]  
96 In patients with VL, anaemia can arise due to one or more associated factors: sequestration  
97 and haemolysis of red blood cells in the spleen associated with hypersplenism, bone marrow  
98 suppression caused by nutritional deficiencies such as iron, vitamin B12 and folate  
99 deficiencies, or due to clotting dysfunction leading to blood loss [1–5]. At the time of clinical  
100 diagnosis, haemoglobin levels are often around 7–10 g/dL but can be as low as 4 g/dL.[1] The  
101 severity of anaemia depends on the duration of clinical illness and can be exacerbated by  
102 comorbidities and iron deficiency [6, 7].

103 After treatment with an antileishmanial drug, haematological improvement generally  
104 occurs within a few weeks with significant recovery expected within 4–6 weeks [3]. The  
105 trajectory of haematological recovery may be affected by patients' age or initial parasite load  
106 [8], but the influence of drug regimen and other patient characteristics remains poorly  
107 understood. Haematological safety of the VL treatment remains an important concern [9].  
108 Therefore, characterisation of haematological profile and identification of drivers associated  
109 with haematological recovery can help in optimal case management. The present individual  
110 participant data meta-analysis (IPD-MA) aimed to characterise the haematological changes in  
111 VL patients after treatment, and understand the role of host, parasite and drug related  
112 characteristics.

## 113 Objectives

114 The objectives of this IPD-MA are:

- 115 1. To identify the determinants of haemoglobin concentration at enrolment, at initial  
116 cure assessment and at definitive cure assessment

- 1  
2  
3 117 2. To characterise the haemoglobin dynamics following treatment  
4  
5  
6 118 3. To identify the determinants of anaemia or severe anaemia at enrolment, at initial  
7  
8 119 cure assessment and at definitive cure assessment  
9  
10 120 4. To describe white blood cells and platelets dynamics following treatment (data  
11  
12  
13 121 permitting)  
14  
15 122 5. To identify predictors of blood transfusion during treatment or follow-up (if  
16  
17  
18 123 available)

21 124 **Methods and analysis: Patients, interventions and outcomes**

23  
24 125 **Elements of the research aim (PICOT)**

25  
26  
27 126 *Population:* Any patient enrolled in a prospective efficacy studies with a confirmed or  
28  
29 127 suspected diagnosis of VL defined by serological and/or parasitological testing.

30  
31  
32 128 *Interventions:* Any antileishmanial therapy.

33  
34  
35 129 *Comparator:* Not restricted by the use of a comparator drug.

36  
37  
38 130 *Outcome:* At least one of the following outcomes reported: anaemia (or haemoglobin  
39  
40  
41 131 measurements) at enrolment, anaemia and other haematological measurements at any  
42  
43 132 post-baseline time-points.

44  
45  
46 133 *Time:* Studies published on or after 1980.

47  
48  
49  
50 134

51  
52 135 **Criteria for study eligibility**

53  
54  
55 136 Studies in the IDDO VL data platform [10] will be deemed eligible for the purpose of this IPD-  
56  
57 137 MA if they meet the following criteria:  
58  
59  
60

- 1  
2  
3 138 • Prospective efficacy studies on patients with confirmed or suspected VL either using  
4  
5 139 microscopy/serology/molecular method (i.e. clinical diagnosis followed by a  
6  
7 140 confirmatory method)  
8  
9  
10 141 • Information is available on treatment regimen including drug, dose, and duration of  
11  
12 142 regimen  
13  
14 143 • Data on anaemia (or haemoglobin/haematocrit concentration) measured at  
15  
16 144 enrolment  
17  
18  
19  
20

21 145 ***Desirable criteria***

- 22  
23 146 • Methodology used for haematological quantification, e.g. name of device used  
24  
25 147 • Information regarding if blood transfusion were given before or after treatment  
26  
27 148 initiation  
28  
29 149 • Information on co-administration of iron supplement  
30  
31  
32  
33

34 150 ***Criteria for participant eligibility***

35  
36  
37 151 The minimum information required for participants from each of the identified studies for  
38  
39 152 inclusion in the IPD-MA analysis are listed below:  
40  
41

- 42  
43 153 • Details of antileishmanial treatment(s) administered  
44  
45 154 • Baseline information on age and gender  
46  
47 155 • Outcome is recorded  
48  
49  
50

51 156

52  
53 157 **Outcomes**

54  
55  
56 158 ***Outcomes and definitions:***  
57  
58  
59  
60

1  
2  
3 159 **Primary outcome:** The primary outcome is the haemoglobin concentration measured at any  
4  
5  
6 160 time-period during the treatment and follow-up phase.  
7

8  
9 161 **Secondary outcomes:** The following endpoints are identified as secondary:  
10

- 11  
12 162 • Anaemia and severe anaemia at baseline, at the time of initial cure assessment and  
13  
14 163 at the time of definitive cure assessment  
15  
16  
17 164 • White blood cells (WBC) at baseline and at any time during the treatment and  
18  
19 165 follow-up  
20  
21  
22 166 • Platelets count at baseline and at any time during the treatment and follow-up  
23  
24 167 • Requirement of blood transfusion during treatment or follow-up (if available)  
25  
26

27 168 Anaemia will be defined following the WHO guidelines [11]. The timing of initial cure  
28  
29 169 assessment would typically take place within 28 days of treatment completion but this  
30  
31 170 varies slightly across studies; assessments undertaken between 15 to 60 days will be  
32  
33 171 considered as time of initial cure assessment. Similarly, the timing of definitive cure  
34  
35 172 assessment will vary according to study design and hence assessments made between 5 to 7  
36  
37 173 months will be considered as 6 months.  
38  
39  
40  
41  
42

43 174

## 45 175 **Statistical methods**

### 48 176 **Identification of relevant studies using IDDO VL library**

51 177 We searched all the articles indexed in the open-access Infectious Diseases Data  
52  
53 178 Observatory visceral leishmaniasis clinical trials library (IDDO VL library).[12] The IDDO VL  
54  
55 179 library is continually updated and follows the Preferred Reporting Items for Systematic-  
56  
57  
58 180 Reviews and Meta-Analyses (PRISMA) guidelines [13]. The IDDO VL library indexes  
59  
60

1  
2  
3 181 publications identified from the following databases: PubMed, Embase, Scopus, Web of  
4  
5 182 Science, Cochrane, clinicaltrials.gov, WHO ICTRP, Global Index Medicus, IMEMR, IMSEAR,  
6  
7  
8 183 and LILACS. For this current review, the search includes all clinical trials published between  
9  
10 184 1st of Jan 1980 and 2nd of May 2021. Details of the search strategy adopted is described  
11  
12  
13 185 elsewhere [13]. The search details are presented in online supplemental file 1. Studies  
14  
15 186 indexed in the IDDO VL library will be eligible for inclusion in this review if they meet the  
16  
17  
18 187 inclusion and exclusion criteria outlined above. This review is not limited by language.  
19  
20

### 21 188 **Collating IPD: IDDO VL data platform**

22  
23 189 Principal investigators and the corresponding authors of the eligible studies  
24  
25  
26 190 identified from IDDO VL library were invited to share IPD. At least two emails will be sent  
27  
28 191 out in case of non-response. Researchers agreeing to the terms and conditions of the  
29  
30 192 submission were invited to upload anonymised IPD to the IDDO repository through a secure  
31  
32  
33 193 web portal [10]. Data in the IDDO VL platform are fully pseudonymised to protect personal  
34  
35 194 information and patient privacy.  
36  
37

### 38 195 **Data management**

39  
40  
41 196 Raw data from individual studies shared with IDDO are currently being standardised  
42  
43 197 using the Clinical Data Interchange Standards Consortium (CDISC) compliant curation  
44  
45  
46 198 standards [14]. Investigators will be further contacted for validation or clarification, if  
47  
48 199 required, and individual study protocols will be requested. On standardisation, the data will  
49  
50  
51 200 be stored in a relational database of several tables containing information on drug regimen,  
52  
53 201 parasitological, clinical, and haematological assessments and therapeutic outcomes.  
54  
55  
56  
57  
58  
59  
60

## 202 **Statistical methods for analysis of primary and secondary outcomes**

### 203 **Descriptive summary of the studies included**

204 Summary of included studies will be presented with respect to study location, years  
205 of study, study population, duration of follow-up, drug regimen, methodology for diagnosis,  
206 supervision of drug administration or treatment adherence (if available), methods and  
207 devices used for haematology measurements.

### 208 **Summary of the participants included**

209 Summary of baseline characteristics of the participants included in the analysis will  
210 be presented for each study, by region and overall. The following will be presented: age;  
211 weight, parasite grade on enrolment, presence of fever (body temperature > 37.5 degrees  
212 Celsius), haemoglobin (or haematocrit), anaemia or severe anaemia as defined using the  
213 WHO definitions [11], spleen size, treatment, total mg/kg dose, and supervision of drug  
214 administration. The number of available patients will be summarised for all variables,  
215 proportions will be used for categorical or binary variables, and mean and standard  
216 deviation (or median and interquartile range) will be used for continuous variables.

### 217 **Analysis of the primary endpoint**

218 Separate linear mixed effect regression models will be undertaken to identify  
219 predictors of haemoglobin concentration at baseline, at the time of initial cure assessment  
220 and at the time of assessment of definitive cure in a one-stage IPD meta-analysis. The  
221 regression models constructed at the time of initial and final cure assessments will adjust for  
222 the baseline measurements of haemoglobin as covariates along with the drug regimen.



1  
2  
3 223 If repeated haemoglobin measurements are available for more than 3 time-points, the  
4  
5  
6 224 longitudinal haemoglobin profile will be characterised using a linear mixed effects regression  
7  
8 225 model by considering time as a continuous variable. Fractional polynomials will be used to  
9  
10 226 explore any non-linear relationship in the evolution of haemoglobin concentration. If there  
11  
12  
13 227 are few numbers of time-points, then time will be considered as a discrete variable (three  
14  
15 228 time-points: baseline, day 30, and day 180) in the regression model. If frequent data is  
16  
17  
18 229 available, then the haemoglobin concentration will be summarised at weekly time-points  
19  
20 230 during the follow-up period.  
21  
22

23 231 The difference between haemoglobin concentration at baseline and at the time of  
24  
25 232 evaluation of definitive cure status (usually at day 180) will be used to quantify the absolute  
26  
27  
28 233 mean disease attributed haematological fall. The difference between haemoglobin  
29  
30 234 concentration at baseline and at the end of the active treatment phase (day 30) will be used  
31  
32  
33 235 to gauge if there is any drug attributed haematological fall.  
34  
35

36 236 Further description of candidate predictors and multivariable modelling is described  
37  
38  
39 237 next.  
40  
41

#### 42 238 **Candidate predictors and core set**

43  
44

45 239 The following variables will be considered for inclusion in the analysis of primary and  
46  
47 240 secondary endpoints.  
48  
49

50 241 The following host variables are considered: age, gender, body weight, nutritional status,  
51  
52 242 comorbidity status (such as HIV), and duration of illness prior to study enrolment.  
53  
54

55 243 Nutritional status in children under 5 years of age will be assessed using standardised age,  
56  
57 244 weight, height and gender specific growth reference standards according to the WHO 2006  
58  
59  
60

1  
2  
3 245 recommendations using igrowup Stata package (or equivalent library will in R be used) [15].  
4

5 246 Anthropometric indicators include weight-for-age (WAZ), height-for-age (HAZ), and weight-  
6  
7

8 247 for-height (WHZ). The nutritional status of a child will be given as a Z-score and classified as  
9

10 248 stunted, underweight or wasted as defined in the WHO guidelines [15].  
11  
12

13 249 The following parasite related baseline factors will be considered: parasite load and  
14

15 250 information regarding the nature of infection (primary vs. previously treated cases). Any  
16  
17

18 251 cases described as previously untreated (or “fresh”) cases for leishmaniasis will be  
19

20 252 considered as primary VL.  
21  
22

23 253 The following drug related variables will be considered for inclusion in analysis: drug  
24

25 254 regimen, mg/kg total dose (or target dose), concomitant infections.  
26  
27

28 255 The following study or arm level variables will be considered in the analysis of primary and  
29  
30

31 256 secondary endpoints: geographical region, country, study site, and calendar year of the  
32  
33

34 257 study conduct.  
35  
36

37 258 The following covariates will be examined in the regression model and considered as core  
38  
39

40 259 predictor set: age, sex, baseline parasite density, HIV co-infection, geographical region,  
41

42 260 baseline haematological measurements. These variables along with the drug regimen will  
43  
44

45 261 form the minimal adjustment set for assessment of other risk factors and will be kept in the  
46  
47

48 262 regression model regardless of statistical significance[16].  
49

### 50 263 **Considerations for multivariable model construction**

  
51  
52

53 264 Multivariable model construction will follow the recommendations of Heinze et al  
54

55 265 (2017) [17]. Nested models will be compared by assessing the change in log-likelihood  
56  
57

58 266 estimates and Akaike’s information criterion (AIC) will be used for comparing competing  
59  
60

1  
2  
3 267 non-nested models. The functional form of the continuous variables will be determined  
4  
5  
6 268 using multivariable fractional polynomials [18] or restricted cubic splines [16]. Stability  
7  
8 269 investigations will be undertaken to account for uncertainty introduced in multivariable  
9  
10 270 modelling through bootstrap resampling [17].  
11  
12

### 13 271 **Handling missing data**

14  
15  
16 272 To assess the impact of missing data, sensitivity analysis will be performed to see if  
17  
18 273 the main conclusions are affected by the exclusion of patients with missing data using  
19  
20 274 multiple imputation [19]. The imputation model will include all the variables in the target  
21  
22 275 analysis and additional auxiliary variables. The target analysis will be carried out in each of  
23  
24 276 the completed (observed plus imputed) datasets and the estimates will be combined across  
25  
26 277 the imputed datasets using Rubin's combination rules [19].  
27  
28  
29  
30  
31

### 32 278 **Sensitivity analyses**

33  
34 279 Two sensitivity analyses will be carried out using resampling techniques to assess  
35  
36 280 model stability. Bootstrap resampling will be used to assess the robustness of the derived  
37  
38 281 estimates and its variance using the recommendations in Heinze et al (2017) [17]. In the  
39  
40 282 second analysis, model will be refitted with one study excluded at a time, and a coefficient  
41  
42 283 of variation around the parameter estimates will be calculated. This would identify any  
43  
44 284 influential studies, that is, studies with unusual results (due to variations in underlying  
45  
46 285 methodology to measure outcomes, patient population, and so on) that affect the overall  
47  
48  
49  
50 286 pooled analysis findings.  
51  
52  
53  
54  
55  
56  
57  
58  
59  
60

1  
2  
3 287 **Analysis of secondary endpoints**  
4  
5

6 288 **Anaemia and severe anaemia at baseline, at test of initial cure and at end of the study**  
7  
8  
9 289 **follow-up**  
10

11  
12 290 A mixed effects logistic regression model will be constructed to identify the  
13  
14 291 predictors associated with anaemia (or severe anaemia) at baseline using a one-stage IPD-  
15  
16  
17 292 MA. Random effects for the study sites will be used to adjust for study-site effect [20].  
18  
19 293 Potential non-linear relationships between continuous predictors and the outcome will be  
20  
21  
22 294 investigated using multivariable fractional polynomials [21]. Similar analysis will be  
23  
24 295 undertaken for anaemia (or severe anaemia) at the time of initial cure, and at the end of the  
25  
26  
27 296 study follow-up. Multivariable model construction will be undertaken as outlined for the  
28  
29 297 primary endpoint.  
30

31  
32 298 **WBC and Platelets (if data are available)**  
33  
34

35 299 The distribution of WBC and platelets will be summarised at baseline, at the time of  
36  
37  
38 300 initial cure assessment and at the time of the definitive cure assessment. If data are  
39  
40 301 available, predictors associated with WBC (or platelet counts) will be carried out using a  
41  
42  
43 302 mixed effects linear regression (appropriate transformation will be used if distribution is  
44  
45 303 skewed). Statistical modelling will be undertaken as for the primary endpoint.  
46  
47

48 304 **Blood transfusion during the study follow-up (if data are available)**  
49  
50

51 305 Predictors associated with requirement of blood transfusion at any stage during the  
52  
53  
54 306 study period will be identified (if data are available) using a mixed effects logistic regression.  
55  
56 307 Multivariable regression modelling will be undertaken as described for the other endpoints.  
57  
58

59 308  
60

### 309 **Subgroup analyses**

310 Patients living with HIV who are treated for VL typically have worse outcomes and  
311 higher mortality risk than those who are not living with HIV [22]. A separate sub-group  
312 analysis will be carried out among patients with defined VL-HIV coinfections (data  
313 permitting). There is a known regional variation in treatment response in VL along with  
314 differences in patient characteristics and treatment guidelines [23]. Therefore, a separate  
315 analysis will be undertaken within each geographical region to construct the univariable and  
316 multivariable regression models for the primary and secondary outcomes.

317 Longitudinal haemoglobin profile will be stratified by the transfusion status at any  
318 stage of the study.

### 319 **Risk of bias assessment in included studies**

320 To examine the risk of bias in IPD-MA, the first four domains of the quality In  
321 prognosis studies (QUIPS) tool and the first three domains of the prediction model risk of  
322 bias assessment tool (PROBAST) will be considered as recommended in Riley et al  
323 (2021)[16]. The relevant domains from the QUIPS checklist are study participation, study  
324 attrition, prognostic factor measurement, and outcome measurement, and the relevant  
325 domains from PROBAST checklist are participant selection, prognostic factors, and  
326 outcomes. Two reviewers will independently assess the risk of bias in the studies included in  
327 the analysis.

328 Risk of bias results will be incorporated into analyses by conducting subgroup  
329 analyses among studies with overall low risk of bias or by conducting formal interaction  
330 analyses with risk of bias responses [24].

1  
2  
3 331 **Assessment of risk of potential bias in missing studies**  
4  
5

6 332 Despite best possible efforts, it is anticipated that raw data from all the identified  
7  
8 333 studies will not be available. The characteristics of patient population and study meta-data  
9  
10 334 from the missing studies will be summarised to explore if the missing studies are  
11  
12 335 systematically different from the studies that are included in the IPD-MA. A two-stage IPD-  
13  
14 336 MA will be considered if sufficient details (or any covariate adjustment) are reported in the  
15  
16 337 original studies.  
17  
18  
19  
20

21 338 **Software**  
22  
23

24 339 All the analysis will be carried out using R software or Stata 17 software [25, 26]. Use  
25  
26 340 of any other data analysis tools will not change the statistical analysis plan.  
27  
28  
29

30 341 **Dissemination plans**  
31  
32

33 342 **Ethics and dissemination**  
34  
35

36 343 This IPD-MA meets the criteria for waiver of ethical review as defined by the Oxford  
37  
38 344 Tropical Research Ethics Committee (OxTREC) granted to IDDO, as the research consists of  
39  
40 345 secondary analysis of existing anonymised data. Ethics approval was granted by the ICMR-  
41  
42 346 Rajendra Memorial Research Institute of Medical Sciences ethics committee (Letter no:  
43  
44 347 RMRI/EC/30/2022) on 04-07-2022. Ethical approval was granted to each study included in  
45  
46 348 this pooled analysis by their respective ethics committees. This IPD-MA will address  
47  
48 349 research questions similar to that of included studies. Findings of this IPD-MA will be  
49  
50 350 reported in open-access, peer-reviewed journals following the PRISMA-IPD guidelines [27].  
51  
52  
53  
54  
55

56 351  
57  
58  
59  
60

1  
2  
3 352 **Patient and public involvement**  
4  
5

6 353 The design and development of this IPD-MA were done by the study authors only and no  
7  
8 354 patient was involved at any stage. Patients and/or the public were not involved in the  
9  
10 355 design, or conduct, or reporting or dissemination plans of this research. The research  
11  
12 356 questions considered in this IPD-MA is based on a research agenda developed by the global  
13  
14 357 VL research community [28].  
15  
16  
17  
18

19 358 **Further development of statistical analysis plan**  
20  
21

22 359 The main analysis is planned as described above. Modification or additional analyses  
23  
24 360 may be required as the data collection progresses. Any modifications of the analysis will be  
25  
26 361 documented and made publicly available on the IDDO study group website [29].  
27  
28  
29  
30  
31  
32  
33  
34  
35  
36  
37  
38  
39  
40  
41  
42  
43  
44  
45  
46  
47  
48  
49  
50  
51  
52  
53  
54  
55  
56  
57  
58  
59  
60

## 362 Discussion

363 Anaemia is a common haematological manifestation of visceral leishmaniasis.  
364 Despite this, the impact of treatment on different haematological parameters remains to be  
365 fully understood. The aim of this IPD meta-analysis is to explore the dynamics of different  
366 haematological parameters during the treatment and the convalescence phase of the  
367 disease. IPD-MA is being used increasingly to explore factors affecting treatment outcomes  
368 which otherwise would not be possible through standard aggregate data meta-analysis [30].

369 This IPD-MA will provide critical information regarding the trajectory of  
370 haematological recovery among VL patients. The assessment of the host, parasite and drug  
371 determinants that influence the haematological response can provide evidence-based  
372 guidance for optimal case management and monitoring drug safety. The IDDO VL library,  
373 which is a comprehensive library of all published studies since 1980 has been used for  
374 identification of the studies eligible for this IPD-MA which has led to the construction of the  
375 IDDO VL data platform. A major strength of this study is that data from several studies will  
376 be harmonised to a common standard (in the IDDO VL data platform) based on an extensive  
377 consultation with the VL research community [14], thus allowing us to address some of the  
378 methodological sources of heterogeneity.

379 A major challenge is that a substantial proportion of the studies in the IDDO library  
380 were conducted prior to the year 2000; the retrieval of data from historical trials is a major  
381 challenge [31, 32]. Another limitation is that the exploration of the predictors of anaemia  
382 and severe anaemia at baseline will be influenced by the underlying eligibility criteria  
383 adopted in clinical trials as clinical trials frequently exclude patients with very low  
384 haemoglobin at presentation [33]. Compared to non-pregnant patients, pregnant women



1  
2  
3 385 are more at an increased risk of requiring blood transfusion [34]. However, pregnancy is  
4  
5  
6 386 often adopted as exclusion criteria in VL trials [33] and the haematological consequences in  
7  
8 387 this important patient group couldn't be explore despite the clear recognition of anaemia  
9  
10 388 and transfusion needs.

11  
12  
13  
14 389 This IPD-MA will characterise the haematological profile of VL patients at enrolment  
15  
16 390 and at the time-points of initial and definitive cure assessments. Findings of this research  
17  
18 391 will generate important information regarding the evolution of different haematological  
19  
20  
21 392 characteristics.

1  
2  
3 393 **Authors' contributions**  
4  
5

6 394 Study conception: AbM, PD, RK, SS-P, NAS, CN, JW, GB, MR, FA, PM, SS, KR, KS, KP, PJG and  
7  
8  
9 395 AhM. Project supervision: PD, AbM, KS, and PJG. Methodology: PD, NAS, SS-P, JW, FA, PJG  
10  
11 396 and KS. Data curation: AbM, SS-P, PM, JW, PD and GB. Project administration: SS-P and CN.  
12  
13  
14 397 Funding acquisition: PJG. Resources: SS-P, FA and PJG. Writing-original draft: AbM, RK, SSP,  
15  
16 398 KS, PJG, AhM, and PD. Writing- review and editing: All authors were involved in reading and  
17  
18  
19 399 critical revision of the initial draft and approved the final manuscript.  
20

21 400 **Funding**  
22  
23

24 401 This work is funded by a Bill & Melinda Gates Foundation grant to the Infectious Diseases  
25  
26  
27 402 Data Observatory, Oxford University, UK (Recipient: Prof. Philippe Guerin; ref: INV-004713).  
28  
29  
30 403 Funding agency had no role in developing the protocol.  
31

32  
33 404 **Conflict of Interest**  
34

35  
36 405 None  
37

38  
39 406 **Data Availability**  
40

41  
42 407 N/A as this is an analysis protocol.  
43  
44

45 408 **Patient consent for publication**  
46

47  
48 409 Not required.  
49

50  
51 410 **Supplemental file**  
52

53  
54 411 Supplemental file 1: Search Details  
55  
56  
57  
58  
59  
60

## References

1. Boelaert M, Sundar S. Leishmaniasis. In: Farrar J, Hotez PJ, Junghanss T, Kang G, Lalloo D, White NJ, editors. *Manson's Tropical Diseases*. 23rd edition. Elsevier Health Sciences; 2013. p. 631–51.
2. Goto Y, Cheng J, Omachi S, Morimoto A. Prevalence, severity, and pathogenesis of anemia in visceral leishmaniasis. *Parasitol Res*. 2017;116:457–64.
3. Varma N, Naseem S. Hematologic changes in visceral Leishmaniasis/Kala Azar. *Indian J Hematol Blood Transfus*. 2010;26:78–82.
4. Kager PA, Rees PH. Haematological investigations in visceral leishmaniasis. *Trop Geogr Med*. 1986;38:371–9.
5. Woodruff AW, Topley E, Knight R, Downie CGB. The Anaemia of Kala Azar. *Br J Haematol*. 1972;22:319–29.
6. Thakur CP. Epidemiological, clinical and therapeutic features of Bihar kala-azar (including post kala-azar dermal leishmaniasis). *Trans R Soc Trop Med Hyg*. 1984;78:391–8.
7. Chulay JD, Bhatt SM, Muigai R, Ho M, Gachihi G, Were JBO, et al. A Comparison of 3 Dosage Regimens of Sodium Stibogluconate in the Treatment of Visceral Leishmaniasis in Kenya. *J Infect Dis*. 1983;148:148–55.
8. Shiferaw E, Murad F, Tigabie M, Abebaw M, Alemu T, Abate S, et al. Hematological profiles of visceral leishmaniasis patients before and after treatment of anti-leishmanial drugs at University of Gondar Hospital; Leishmania Research and Treatment Center Northwest, Ethiopia. *BMC Infect Dis*. 2021;21:1–7.

- 1  
2  
3 433 9. Singh-Phulgenda S, Dahal P, Ngu R, Maguire BJ, Hawryszkiewicz A, Rashan S, et al. Serious  
4  
5  
6 434 adverse events following treatment of visceral leishmaniasis: A systematic review and meta-  
7  
8 435 analysis. *PLoS Negl Trop Dis*. 2021;15:e0009302.  
9  
10  
11 436 10. Infectious Diseases Data Observatory. Visceral leishmaniasis Data Inventory. [iddo.org](http://iddo.org).  
12  
13 437 2023. <https://www.iddo.org/document/visceral-leishmaniasis-data-inventory>. Accessed 27  
14  
15  
16 438 Feb 2023.  
17  
18  
19 439 11. Vitamin and Mineral Nutrition Information System. World Health Organization.  
20  
21 440 Haemoglobin concentrations for the diagnosis of anaemia and assessment of severity.  
22  
23 441 Geneva, Switzerland, World Health Organization (WHO/NMH/NHD/MNM/11.1). 2011.  
24  
25  
26  
27 442 12. Infectious Diseases Data Observatory. VL Surveyor. [www.iddo.org](http://www.iddo.org). 2020.  
28  
29 443 <https://www.iddo.org/vlSurveyor/#0>. Accessed 17 Sep 2020.  
30  
31  
32  
33 444 13. Singh-Phulgenda S, Rashan S, Harriss E, Dahal P, Naylor C, Brack M, et al. Infectious  
34  
35 445 diseases data observatory (IDDO) visceral leishmaniasis library of clinical therapeutic  
36  
37 446 studies: A protocol for a living systematic review of clinical studies. *Wellcome Open Res*.  
38  
39 447 2022;7 May:155.  
40  
41  
42  
43 448 14. Infectious Diseases Data Observatory. New global collaboration developing standards for  
44  
45 449 standardised data collection across the VL research community. 2020.  
46  
47  
48 450 <https://www.iddo.org/news/new-global-collaboration-developing-standards-standardised->  
49  
50 451 [data-collection-across-vl-research](https://www.iddo.org/news/new-global-collaboration-developing-standards-standardised-). Accessed 28 Feb 2023.  
51  
52  
53  
54 452 15. WHO Multicentre Growth Reference Study Group. WHO Child Growth Standards:  
55  
56 453 Length/height-for-age, weight-for-age, weight-for-length, weight-for-height and body mass  
57  
58 454 index-for-age: Methods and development. . Geneva World Heal Organ. 2006;:312.  
59  
60

- 1  
2  
3 455 16. Riley RD, Moons KGM, Debray TPA. IPD Meta-Analysis for Prognostic Factor Research. In:  
4  
5  
6 456 Richard D. Riley, Jayne F. Tierney LAS, editor. Individual Participant Data Meta-Analysis: A  
7  
8 457 Handbook for Healthcare Research. John Wiley & Sons Ltd; 2021. p. 421–45.  
9  
10  
11 458 17. Heinze G, Wallisch C, Dunkler D. Variable selection – A review and recommendations for  
12  
13  
14 459 the practicing statistician. *Biometrical J.* 2018;60:431–49.  
15  
16  
17 460 18. Sauerbrei W, Royston P, Binder H. Selection of important variables and determination of  
18  
19 461 functional form for continuous predictors in multivariable model building. *Stat Med.*  
20  
21 462 2007;26:5512–28.  
22  
23  
24 463 19. White IR, Royston P, Wood AM. Multiple imputation using chained equations: Issues and  
25  
26 464 guidance for practice. *Stat Med.* 2011;30:377–99.  
27  
28  
29  
30 465 20. Glidden D V, Vittinghoff E. Modelling clustered survival data from multicentre clinical  
31  
32 466 trials. *Stat Med.* 2004;23:369–88.  
33  
34  
35  
36 467 21. Royston P, Sauerbrei W. Multivariable Model-Building: A Pragmatic Approach to  
37  
38 468 Regression Analysis based on Fractional Polynomials for Modelling Continuous Variables. In:  
39  
40 469 Multivariable Model-Building: A Pragmatic Approach to Regression Analysis based on  
41  
42 470 Fractional Polynomials for Modelling Continuous Variables. John Wiley & Sons, Ltd; 2008. p.  
43  
44 471 pp: 71-98.  
45  
46  
47  
48 472 22. World Health Organization. WHO guidelines for the treatment of visceral leishmaniasis  
49  
50 473 in HIV co-infected patients in East Africa and South-East Asia. Geneva, Switzerland; 2022.  
51  
52  
53  
54 474 23. Alves F, Bilbe G, Blesson S, Goyal V, Monnerat S, Mowbray C, et al. Recent Development  
55  
56 475 of Visceral Leishmaniasis Treatments: Successes, Pitfalls, and Perspectives. *Clin Microbiol*  
57  
58 476 *Rev.* 2018;31:1–30.  
59  
60

- 1  
2  
3 477 24. Levis B, Snell K, Takwoingi Y, Collins GS, Moons KG, Reitsma JB, Hooft L, Stewart LA,  
4  
5  
6 478 Tierney JF RR. Evaluating risk of bias and applicability in individual participant data meta-  
7  
8 479 analyses. In: *Advances in Evidence Synthesis: special issue Cochrane Database of Systematic*  
9  
10 480 *Reviews*. 2020. p. (9 Suppl 1).
- 11  
12  
13 481 25. R Core Team. *R: A language and environment for statistical computing*. 2021.
- 14  
15  
16 482 26. StataCorp. *Stata Statistical Software: Release 17*. 2021.
- 17  
18  
19  
20 483 27. Stewart LA, Clarke M, Rovers M, Riley RD, Simmonds M, Stewart G, et al. Preferred  
21  
22 484 reporting items for a systematic review and meta-analysis of individual participant data: The  
23  
24 485 PRISMA-IPD statement. *JAMA - J Am Med Assoc*. 2015;313:1657–65.
- 25  
26  
27  
28 486 28. Infectious Diseases Data Observatory. *Visceral leishmaniasis research agenda*. 2019.  
29  
30 487 <https://www.iddo.org/vl/research/research-agenda>. Accessed 28 Feb 2023.
- 31  
32  
33 488 29. Infectious Diseases Data Observatory. *Anaemia among patients with visceral*  
34  
35 489 *leishmaniasis and haematological dynamics post treatment*. 2022.  
36  
37 490 [https://www.iddo.org/anaemia-among-patients-visceral-leishmaniasis-and-haematological-](https://www.iddo.org/anaemia-among-patients-visceral-leishmaniasis-and-haematological-dynamics-post-treatment)  
38  
39 491 [dynamics-post-treatment](https://www.iddo.org/anaemia-among-patients-visceral-leishmaniasis-and-haematological-dynamics-post-treatment). Accessed 27 Apr 2022.
- 40  
41  
42  
43 492 30. Riley RD, Lambert PC, Abo-Zaid G. Meta-analysis of individual participant data:  
44  
45 493 Rationale, conduct, and reporting. *BMJ*. 2010;340:521–5.
- 46  
47  
48  
49 494 31. Vines TH, Albert AYK, Andrew RL, Débarre F, Bock DG, Franklin MT, et al. The availability  
50  
51 495 of research data declines rapidly with article age. *Curr Biol*. 2014;24:94–7.
- 52  
53  
54  
55 496 32. Nevitt SJ, Marson AG, Davie B, Reynolds S, Williams L, Smith CT. Exploring changes over  
56  
57 497 time and characteristics associated with data retrieval across individual participant data  
58  
59 498 meta-analyses: Systematic review. *BMJ*. 2017;357.

- 1  
2  
3 499 33. Dahal P, Singh-Phulgenda S, Naylor C, Brack M, Chatterjee M, Alves F, et al. Design,  
4  
5  
6 500 conduct, analysis, and reporting of therapeutic efficacy studies in Visceral Leishmaniasis: A  
7  
8 501 systematic review of published reports, 2000-2021 Journal: Under Rev. 2023.  
9  
10 502 <https://doi.org/https://doi.org/10.1101/2023.09.06.23295148>.  
11  
12  
13 503 34. Pekelharing JE, Gatluak F, Harrison T, Maldonado F, Siddiqui R, Ritmeijer K. Outcomes of  
14  
15  
16 504 visceral leishmaniasis in pregnancy : A retrospective cohort study from South Sudan. PLoS  
17  
18 505 Negl Trop Dis. 2020;14:e0007992.  
19  
20  
21  
22 506

## Example of Search Strategies: The dates will be different for future searches

### Pubmed

((((((((randomized controlled trial[pt] OR controlled clinical trial[pt] OR randomized[tiab] OR placebo[tiab] OR clinical trials as topic[mesh:noexp] OR randomly[tiab] OR trial[ti] NOT (animals[mh] NOT humans [mh]))) AND Clinical Trial[ptyp])) AND (((("Leishmaniasis, Visceral"[Mesh]) OR visceral leishmaniasis[Title/Abstract]) OR kala azar[Title/Abstract]) OR black fever[Title/Abstract])) OR (((((((((((("Pentamidine"[Mesh]) OR "liposomal amphotericin B" [Supplementary Concept]) OR "Amphotericin B"[Mesh]) OR "Paromomycin"[Mesh]) OR "miltefosine" [Supplementary Concept]) OR "Sodium"[Mesh]) OR "8-aminoquinoline" [Supplementary Concept]) OR "Ketoconazole"[Mesh]) OR "Azoles"[Mesh]) OR "Allopurinol"[Mesh]) OR ( "Atovaquone"[Mesh] OR "atovaquone, proguanil drug combination" [Supplementary Concept] ))) OR ((pentamidine[Title/Abstract] OR ambisome[Title/Abstract] OR amphotericin[Title/Abstract] OR paromomycin[Title/Abstract] OR miltefosine[Title/Abstract] OR pentavalent[Title/Abstract] OR sodium[Title/Abstract] OR sitamaquine[Title/Abstract] OR azole\*[Title/Abstract] OR allopurinol[Title/Abstract] OR atovaquone[Title/Abstract] OR ketoconazole[Title/Abstract] OR fluconazole[Title/Abstract] OR metronidazole[Title/Abstract]))) AND (((("Leishmaniasis, Visceral"[Mesh]) OR visceral leishmaniasis[Title/Abstract]) OR kala azar[Title/Abstract]) OR black fever[Title/Abstract])) NOT (((animals not humans)))  
Filters activated: Publication date from 2016/01/01 to 2020/12/31.

- This search strategy uses the PubMed RCT filter for sensitivity- and precision-maximising version (2008). <https://work.cochrane.org/pubmed>

### Database: Embase 1974 to present

#### Search Strategy:

-----

- 1 exp visceral leishmaniasis/ (9675)
- 2 "black fever".ti,ab. (17)
- 3 "kala azar".ti,ab. (2227)
- 4 "visceral leishmaniasis".ti,ab. (9360)
- 5 1 or 2 or 3 or 4 (12383)
- 6 exp randomized controlled trial/ (603493)
- 7 Controlled clinical study/ (464274)
- 8 Random\$.ti,ab. (1531396)
- 9 randomization/ (86779)
- 10 intermethod comparison/ (260073)
- 11 placebo.ti,ab. (305154)
- 12 (compare or compared or comparison).ti. (507638)
- 13 ((evaluated or evaluate or evaluating or assessed or assess) and (compare or compared or comparing or comparison)).ab. (2100417)
- 14 (open adj label).ti,ab. (78868)
- 15 ((double or single or doubly or singly) adj (blind or blinded or blindly)).ti,ab. (231216)
- 16 double blind procedure/ (172220)
- 17 parallel group\$.ti,ab. (25399)
- 18 (crossover or cross over).ti,ab. (104779)



- 1  
2  
3 19 ((assign\$ or match or matched or allocation) adj5 (alternate or group\$1 or intervention\$1 or patient\$1 or  
4 subject\$1 or participant\$1)).ti,ab. (328145)  
5 20 (assigned or allocated).ti,ab. (386517)  
6 21 (controlled adj7 (study or design or trial)).ti,ab. (346624)  
7 22 (volunteer or volunteers).ti,ab. (245818)  
8 23 trial.ti. (298535)  
9 24 6 or 7 or 8 or 9 or 10 or 11 or 12 or 13 or 14 or 15 or 16 or 17 or 18 or 19 or 20 or 21 or 22 or 23  
10 (4650673)  
11 25 5 and 24 (1506)  
12 26 (pentamidine or ambisome or amphotericin or paromomycin or miltefosine or pentavalent or sodium or  
13 sitamaquine or azole\* or allopurinol or atovaquone or ketoconazole or fluconazole or metronidazole).mp.  
14 (1012481)  
15 27 5 and 26 (3701)  
16 28 25 or 27 (4786)  
17 29 (exp animal/ or animal.hw. or nonhuman/) not (exp human/ or human cell/ or (human or humans).ti.)  
18 (6396469)  
19 30 28 not 29 (3730)  
20 31 30 (3730)  
21 32 limit 31 to yr="2016 -Current" (774)

- 22  
23  
24 ➤ This search strategy uses the Cochrane RCT filter for Embase.

25 <https://www.cochranelibrary.com/central/central-creation>

## 26 Scopus

27  
28  
29  
30 (( TITLE-ABS-KEY ( "visceral leishmaniasis" OR "kala azar" OR "black fever" )) AND ( ( TITLE-ABS-KEY ( random\* OR rct OR placebo OR allocat\* OR crossover\* OR "cross  
31 over" OR trial OR ( doubl\* W/1 blind\* ) OR ( singl\* W/1 blind\* )) ) OR ( TITLE-ABS-KEY ( control\* W/1 trial\* )) OR ( TITLE-ABS-KEY ( cohort\* )) ) ) OR ( ( TITLE-ABS-KEY ( "visceral  
32 leishmaniasis" OR "kala azar" OR "black fever" )) AND ( TITLE-ABS-KEY ( pentamidine OR  
33 ambisome OR amphotericin OR paromomycin OR miltefosine OR pentavalent OR  
34 sodium OR sitamaquine OR azole\* OR allopurinol OR atovaquone OR ketoconazole OR  
35 fluconazole OR metronidazole )) ) AND ( EXCLUDE ( EXACTKEYWORD , "Animals" ) OR  
36 EXCLUDE ( EXACTKEYWORD , "Animal" ) OR EXCLUDE ( EXACTKEYWORD , "Animal  
37 Experiment" ) OR EXCLUDE ( EXACTKEYWORD , "Mouse" ) OR EXCLUDE ( EXACTKEYWORD  
38 , "Mice" ) OR EXCLUDE ( EXACTKEYWORD , "Dogs" )) AND ( LIMIT-TO ( LIMIT-TO ( PUBYEAR , 2020 ) OR ( PUBYEAR , 2019 ) OR LIMIT-TO ( PUBYEAR , 2018 ) OR LIMIT-TO ( PUBYEAR , 2017 ) OR LIMIT-TO ( PUBYEAR , 2016 ) ) )

## 39 Web of Science Core Collection

- 40  
41  
42  
43  
44  
45  
46  
47  
48  
49  
50 1. TOPIC: ("visceral leishmaniasis" OR "kala azar" OR "black fever")  
51 2. TOPIC: (random\* OR rct OR placebo OR allocat\* OR crossover\* OR "cross over" OR trial OR  
52 (doubl\* near/1 blind\*) OR (singl\* near/1 blind\*))  
53 3. TOPIC: (control\* near/1 trial\*)  
54 4. TOPIC: (cohort\*)  
55 5. #4 OR #3 OR #2  
56 6. #5 AND #1  
57 7. TOPIC: (pentamidine OR ambisome OR amphotericin OR paromomycin OR miltefosine OR  
58 pentavalent OR sodium OR sitamaquine OR azole\* OR allopurinol OR atovaquone OR  
59 ketoconazole OR fluconazole OR metronidazole)  
60

8. #7 AND #1
9. #8 OR #6
10. #8 OR #6
11. Refined by: PUBLICATION YEARS: ( 2020 OR 2019 OR 2018 OR 2017 OR 2016 )

### Cochrane Central Register of Controlled Trials

Issue 5 of 12, May 2020

#1 MeSH descriptor: [Leishmaniasis, Visceral] explode all trees 39

#2 "black fever" 1

#3 "kala azar" 119

#4 "visceral leishmaniasis" 242

#5 #1 or #2 or #3 or #4 283

Custom Range: 2016 to 2020

World Health Organization Global Index Medicus <https://www.globalindexmedicus.net/>

tw:(tw:(("visceral leishmaniasis" OR "kala azar" OR "black fever") ) AND (instance:"ghl") AND ( year\_cluster:( "2016" OR "2017" OR "2018" OR "2019" OR "2020" ))) AND (instance:"ghl")

ClinicalTrials.gov Advanced Search <https://clinicaltrials.gov/ct2/search/advanced?>

Condition or disease: visceral leishmaniasis OR kala azar OR black fever

WHO International Clinical Trials Registry Platform <http://apps.who.int/trialsearch/>

visceral leishmaniasis OR kala azar OR black fever – Trials at ALL stages

2016 – date

NOTE: THIS PLATFORM IS UNAVAILABLE ON 14/05/2020

PRISMA-P (preferred reporting items for systematic review and meta-analysis protocols) 2015 checklist: recommended items to address in a systematic review protocol

| Section and topic                                                                                                                       | Item No | Checklist item                                                                                                                                                             |
|-----------------------------------------------------------------------------------------------------------------------------------------|---------|----------------------------------------------------------------------------------------------------------------------------------------------------------------------------|
| <b>Administrative information</b>                                                                                                       |         |                                                                                                                                                                            |
| Authors: All page numbers relates to the clear revised submission version of the manuscript submitted On the 10 <sup>th</sup> Oct 2023. |         |                                                                                                                                                                            |
| Title:                                                                                                                                  |         |                                                                                                                                                                            |
| Identification                                                                                                                          | 1a      | A protocol for individual participant data meta-analysis; page 1; line 2-3.                                                                                                |
| Update                                                                                                                                  | 1b      | Not applicable                                                                                                                                                             |
| Registration                                                                                                                            | 2       | PROSPERO registration: CRD42021284622; page 4; lines 72-73.                                                                                                                |
| Authors:                                                                                                                                |         |                                                                                                                                                                            |
| Contact                                                                                                                                 | 3a      | Name with institutional affiliations of all authors and e-mail address corresponding authors; pages 1-2; lines 9-39.<br>E-mail address of all authors; page 2; lines 22-39 |
| Contributions                                                                                                                           | 3b      | Authors' contribution; page 21; line 388-394.                                                                                                                              |
| Amendments                                                                                                                              | 4       | Not applicable                                                                                                                                                             |
| Support:                                                                                                                                |         |                                                                                                                                                                            |
| Sources                                                                                                                                 | 5a      | Funding; page 21; line 395-398.                                                                                                                                            |
| Sponsor                                                                                                                                 | 5b      | Funding; page 21; line 395-398.                                                                                                                                            |
| Role of sponsor or funder                                                                                                               | 5c      | Funding; page 21; line 395-398.                                                                                                                                            |
| <b>Introduction</b>                                                                                                                     |         |                                                                                                                                                                            |
| Rationale                                                                                                                               | 6       | Introduction; page 6; lines 95-112.                                                                                                                                        |
| Objectives                                                                                                                              | 7       | Study objectives; pages 6-7; lines 113-123.                                                                                                                                |
| <b>Methods</b>                                                                                                                          |         |                                                                                                                                                                            |
| Eligibility criteria                                                                                                                    | 8       | Elements of PICOT & study and patient eligibility criteria:<br>Pages 7-8; Lines 124-155                                                                                    |
| Information sources                                                                                                                     | 9       | Identification of relevant studies using IDDO VL library<br>Pages 9-10: Lines 176-186                                                                                      |
| Search strategy                                                                                                                         | 10      | Identification of relevant studies using IDDO VL library                                                                                                                   |

| Section and topic                  | Item No | Checklist item                                                                             |
|------------------------------------|---------|--------------------------------------------------------------------------------------------|
|                                    |         | Pages 9-10: Lines 176-186                                                                  |
| Study records:                     |         |                                                                                            |
| Data management                    | 11a     | Collating IPD & Data management; page 10; lines 187-200.                                   |
| Selection process                  | 11b     | Identification of relevant studies using IDDO VL library<br>Pages 9-10: Lines 176-186      |
| Data collection process            | 11c     | Collating IPD & Data management; page 10; lines 187-200.                                   |
| Data items                         | 12      | Statistical methods for primary and secondary outcomes; page 11-12; lines 201-261          |
| Outcomes and prioritization        | 13      | Outcomes and definitions; page 8-9; lines 157-173.                                         |
| Risk of bias in individual studies | 14      | Risk of bias assessment in included studies<br>page 16; lines 318-328                      |
| Data synthesis                     | 15a     | Handling missing data; page 14; lines 27-276.                                              |
|                                    | 15b     | Assessment of risk of potential bias in missing studies; pages 16-17; line 329-335.        |
|                                    | 15c     | Subgroup analyses: Page 16; lines 308-317<br>Sensitivity analyses; page 14; lines 277-285. |
|                                    | 15d     | Assessment of risk of potential bias in missing studies; pages 16-17; line 329-335.        |
| Meta-bias(es)                      | 16      | Risk of bias assessment in included studies<br>page 16; lines 318-328                      |
| Confidence in cumulative evidence  | 17      | Risk of bias assessment in included studies<br>page 16; lines 318-328                      |
