# Supplementary material for: Haematological dynamics following treatment of visceral leishmaniasis: a protocol for systematic review and individual participant data (IPD) meta-analysis
Source: PubMed Central journal article supplement (PMC10729213; doi:10.1136/bmjopen-2023-074841), 2023-12-14
Supplement: bmjopen-2023-074841supp001.pdf [file bmjopen-2023-074841supp001.pdf]

## Example of Search Strategies: The dates will be different for future searches

### Pubmed

(((((randomized controlled trial[pt] OR controlled clinical trial[pt] OR randomized[tiab] OR placebo[tiab] OR clinical trials as topic[mesh:noexp] OR randomly[tiab] OR trial[ti] NOT (animals[mh] NOT humans [mh]))) AND Clinical Trial[ptyp])) AND (((("Leishmaniasis, Visceral"[Mesh]) OR visceral leishmaniasis[Title/Abstract] OR kala azar[Title/Abstract]) OR black fever[Title/Abstract])) OR (((((((((((("Pentamidine"[Mesh]) OR "liposomal amphotericin B" [Supplementary Concept]) OR "Amphotericin B"[Mesh]) OR "Paromomycin"[Mesh]) OR "miltefosine" [Supplementary Concept]) OR "Sodium"[Mesh]) OR "8-aminoquinoline" [Supplementary Concept]) OR "Ketoconazole"[Mesh]) OR "Azoles"[Mesh]) OR "Allopurinol"[Mesh]) OR ("Atovaquone"[Mesh] OR "atovaquone, proguanil drug combination" [Supplementary Concept] ))) OR ((pentamidine[Title/Abstract] OR ambisome[Title/Abstract] OR amphotericin[Title/Abstract] OR paromomycin[Title/Abstract] OR miltefosine[Title/Abstract] OR pentavalent[Title/Abstract] OR sodium[Title/Abstract] OR sitamaquine[Title/Abstract] OR azole\*[Title/Abstract] OR allopurinol[Title/Abstract] OR atovaquone[Title/Abstract] OR ketoconazole[Title/Abstract] OR fluconazole[Title/Abstract] OR metronidazole[Title/Abstract]))) AND (((("Leishmaniasis, Visceral"[Mesh]) OR visceral leishmaniasis[Title/Abstract] OR kala azar[Title/Abstract]) OR black fever[Title/Abstract])) NOT ((animals not humans)))  
 Filters activated: Publication date from 2016/01/01 to 2020/12/31.

- This search strategy uses the PubMed RCT filter for sensitivity- and precision-maximising version (2008). <https://work.cochrane.org/pubmed>

### Database: Embase 1974 to present

#### Search Strategy:

- 
- 1 exp visceral leishmaniasis/ (9675)
  - 2 "black fever".ti,ab. (17)
  - 3 "kala azar".ti,ab. (2227)
  - 4 "visceral leishmaniasis".ti,ab. (9360)
  - 5 1 or 2 or 3 or 4 (12383)
  - 6 exp randomized controlled trial/ (603493)
  - 7 Controlled clinical study/ (464274)
  - 8 Random\$.ti,ab. (1531396)
  - 9 randomization/ (86779)
  - 10 intermethod comparison/ (260073)
  - 11 placebo.ti,ab. (305154)
  - 12 (compare or compared or comparison).ti. (507638)
  - 13 ((evaluated or evaluate or evaluating or assessed or assess) and (compare or compared or comparing or comparison)).ab. (2100417)
  - 14 (open adj label).ti,ab. (78868)
  - 15 ((double or single or doubly or singly) adj (blind or blinded or blindly)).ti,ab. (231216)
  - 16 double blind procedure/ (172220)
  - 17 parallel group\$.ti,ab. (25399)
  - 18 (crossover or cross over).ti,ab. (104779)

- 19 ((assign\$ or match or matched or allocation) adj5 (alternate or group\$1 or intervention\$1 or patient\$1 or subject\$1 or participant\$1)).ti,ab. (328145)
- 20 (assigned or allocated).ti,ab. (386517)
- 21 (controlled adj7 (study or design or trial)).ti,ab. (346624)
- 22 (volunteer or volunteers).ti,ab. (245818)
- 23 trial.ti. (298535)
- 24 6 or 7 or 8 or 9 or 10 or 11 or 12 or 13 or 14 or 15 or 16 or 17 or 18 or 19 or 20 or 21 or 22 or 23 (4650673)
- 25 5 and 24 (1506)
- 26 (pentamidine or ambisome or amphotericin or paromomycin or miltefosine or pentavalent or sodium or sitamaquine or azole\* or allopurinol or atovaquone or ketoconazole or fluconazole or metronidazole).mp. (1012481)
- 27 5 and 26 (3701)
- 28 25 or 27 (4786)
- 29 (exp animal/ or animal.hw. or nonhuman/) not (exp human/ or human cell/ or (human or humans).ti. (6396469)
- 30 28 not 29 (3730)
- 31 30 (3730)
- 32 limit 31 to yr="2016 -Current" (774)

- This search strategy uses the Cochrane RCT filter for Embase.  
<https://www.cochranelibrary.com/central/central-creation>

### Scopus

(( TITLE-ABS-KEY ( "visceral leishmaniasis" OR "kala azar" OR "black fever" )) AND (( TITLE-ABS-KEY ( random\* OR rct OR placebo OR allocat\* OR crossover\* OR "cross over" OR trial OR ( doubl\* W/1 blind\* ) OR ( singl\* W/1 blind\* ) ) ) OR ( TITLE-ABS-KEY ( control\* W/1 trial\* ) ) OR ( TITLE-ABS-KEY ( cohort\* ) ) ) ) OR (( TITLE-ABS-KEY ( "visceral leishmaniasis" OR "kala azar" OR "black fever" )) AND ( TITLE-ABS-KEY ( pentamidine OR ambisome OR amphotericin OR paromomycin OR miltefosine OR pentavalent OR sodium OR sitamaquine OR azole\* OR allopurinol OR atovaquone OR ketoconazole OR fluconazole OR metronidazole ) ) ) AND ( EXCLUDE ( EXACTKEYWORD , "Animals" ) OR EXCLUDE ( EXACTKEYWORD , "Animal" ) OR EXCLUDE ( EXACTKEYWORD , "Animal Experiment" ) OR EXCLUDE ( EXACTKEYWORD , "Mouse" ) OR EXCLUDE ( EXACTKEYWORD , "Mice" ) OR EXCLUDE ( EXACTKEYWORD , "Dogs" ) ) AND ( LIMIT-TO ( LIMIT-TO ( PUBYEAR , 2020 ) OR ( PUBYEAR , 2019 ) OR LIMIT-TO ( PUBYEAR , 2018 ) OR LIMIT-TO ( PUBYEAR , 2017 ) OR LIMIT-TO ( PUBYEAR , 2016 ) ) )

### Web of Science Core Collection

1. TOPIC: ("visceral leishmaniasis" OR "kala azar" OR "black fever")
2. TOPIC: (random\* OR rct OR placebo OR allocat\* OR crossover\* OR "cross over" OR trial OR (doubl\* near/1 blind\*) OR (singl\* near/1 blind\*))
3. TOPIC: (control\* near/1 trial\*)
4. TOPIC: (cohort\*)
5. #4 OR #3 OR #2
6. #5 AND #1
7. TOPIC: (pentamidine OR ambisome OR amphotericin OR paromomycin OR miltefosine OR pentavalent OR sodium OR sitamaquine OR azole\* OR allopurinol OR atovaquone OR ketoconazole OR fluconazole OR metronidazole)

8. #7 AND #1
9. #8 OR #6
10. #8 OR #6
11. Refined by: PUBLICATION YEARS: ( 2020 OR 2019 OR 2018 OR 2017 OR 2016 )

#### Cochrane Central Register of Controlled Trials

Issue 5 of 12, May 2020

|    |                                                              |     |
|----|--------------------------------------------------------------|-----|
| #1 | MeSH descriptor: [Leishmaniasis, Visceral] explode all trees | 39  |
| #2 | "black fever" 1                                              |     |
| #3 | "kala azar" 119                                              |     |
| #4 | "visceral leishmaniasis" 242                                 |     |
| #5 | #1 or #2 or #3 or #4                                         | 283 |

Custom Range: 2016 to 2020

World Health Organization Global Index Medicus <https://www.globalindexmedicus.net/>

tw:(tw:(("visceral leishmaniasis" OR "kala azar" OR "black fever" ) AND (instance:"ghl") AND ( year\_cluster:( "2016" OR "2017" OR "2018" OR "2019" OR "2020" ))) AND (instance:"ghl")

ClinicalTrials.gov Advanced Search <https://clinicaltrials.gov/ct2/search/advanced?>

Condition or disease: visceral leishmaniasis OR kala azar OR black fever

WHO International Clinical Trials Registry Platform <http://apps.who.int/trialsearch/>

visceral leishmaniasis OR kala azar OR black fever – Trials at ALL stages  
2016 – date

NOTE: THIS PLATFORM IS UNAVAILABLE ON 14/05/2020
